# Supplementary material for: The effect of targeted treatment on people with patellofemoral pain: a pragmatic, randomised controlled feasibility study
Source: Springer Nature journal article supplement (doi:10.1186/s12891-017-1698-7), 2017-08-04
Supplement: MOESM1 [file 13349938]

### WEEK ONE – Home Exercise Training Diary

Please perform the marked exercises three times per week (including the supervised session). Mark when the exercises are completed – there are seven boxes, one for each day of the week.

Rest for 2 minutes between sets

| To complete | Exercise                                                                          | Description                                                                                                                                                                          | Week                                                                               | Sets                                                                                                                                                                                                                                          | Repetitions | To mark when completed | % Completed |
|-------------|-----------------------------------------------------------------------------------|--------------------------------------------------------------------------------------------------------------------------------------------------------------------------------------|------------------------------------------------------------------------------------|-----------------------------------------------------------------------------------------------------------------------------------------------------------------------------------------------------------------------------------------------|-------------|------------------------|-------------|
|             |  | <ol style="list-style-type: none"> <li>Lying on your side with painful leg on top</li> <li>Ensure your leg is in a neutral position</li> <li>Slowly lift your leg upwards</li> </ol> | Week 1                                                                             |                                                                                                                                                                                                                                               |             |                        |             |
|             |                                                                                   |                                                                                                                                                                                      | Week 2                                                                             |                                                                                                                                                                                                                                               |             |                        |             |
|             |                                                                                   |                                                                                                                                                                                      | Week 3                                                                             |                                                                                                                                                                                                                                               |             |                        |             |
|             |                                                                                   |                                                                                                                                                                                      | Week 4                                                                             |                                                                                                                                                                                                                                               |             |                        |             |
|             |                                                                                   |                                                                                                                                                                                      | Week 5                                                                             |                                                                                                                                                                                                                                               |             |                        |             |
|             |                                                                                   |                                                                                                                                                                                      | Week 6                                                                             |                                                                                                                                                                                                                                               |             |                        |             |
|             |                                                                                   |                                                                                                                                                                                      |  | <ol style="list-style-type: none"> <li>Lying on your side with painful leg on top</li> <li>Ensure your leg is in a neutral position</li> <li>Tie yellow band around both ankles</li> <li>Slowly lift your leg upwards against band</li> </ol> | Week 1      |                        |             |
|             | Week 2                                                                            |                                                                                                                                                                                      |                                                                                    |                                                                                                                                                                                                                                               |             |                        |             |
|             | Week 3                                                                            |                                                                                                                                                                                      |                                                                                    |                                                                                                                                                                                                                                               |             |                        |             |
|             | Week 4                                                                            |                                                                                                                                                                                      |                                                                                    |                                                                                                                                                                                                                                               |             |                        |             |
|             | Week 5                                                                            |                                                                                                                                                                                      |                                                                                    |                                                                                                                                                                                                                                               |             |                        |             |
|             | Week 6                                                                            |                                                                                                                                                                                      |                                                                                    |                                                                                                                                                                                                                                               |             |                        |             |

Patient number

|  |  |  |
|--|--|--|
|  |  |  |
|--|--|--|

Date of issue

|   |   |   |   |   |   |
|---|---|---|---|---|---|
| D | D | M | M | Y | Y |
|---|---|---|---|---|---|

### WEEK ONE – Home Exercise Training Diary

Please perform the marked exercises three times per week (including the supervised session). Mark when the exercises are completed – there are seven boxes, one for each day of the week.

Rest for 2 minutes between sets

|                                                                                    |                                                                                                                                                                                                                                                          |        |  |  |  |  |  |  |  |  |  |  |  |  |  |  |  |  |  |  |
|------------------------------------------------------------------------------------|----------------------------------------------------------------------------------------------------------------------------------------------------------------------------------------------------------------------------------------------------------|--------|--|--|--|--|--|--|--|--|--|--|--|--|--|--|--|--|--|--|
|   | <ol style="list-style-type: none"> <li>1. Lying on your side with painful leg on top</li> <li>2. Ensure your leg is in a neutral position</li> <li>3. Tie red band around both ankles</li> <li>4. Slowly lift your leg upwards against band</li> </ol>   | Week 1 |  |  |  |  |  |  |  |  |  |  |  |  |  |  |  |  |  |  |
|                                                                                    |                                                                                                                                                                                                                                                          | Week 2 |  |  |  |  |  |  |  |  |  |  |  |  |  |  |  |  |  |  |
|                                                                                    |                                                                                                                                                                                                                                                          | Week 3 |  |  |  |  |  |  |  |  |  |  |  |  |  |  |  |  |  |  |
|                                                                                    |                                                                                                                                                                                                                                                          | Week 4 |  |  |  |  |  |  |  |  |  |  |  |  |  |  |  |  |  |  |
|                                                                                    |                                                                                                                                                                                                                                                          | Week 5 |  |  |  |  |  |  |  |  |  |  |  |  |  |  |  |  |  |  |
|                                                                                    |                                                                                                                                                                                                                                                          | Week 6 |  |  |  |  |  |  |  |  |  |  |  |  |  |  |  |  |  |  |
|                                                                                    |                                                                                                                                                                                                                                                          | Week 7 |  |  |  |  |  |  |  |  |  |  |  |  |  |  |  |  |  |  |
|  | <ol style="list-style-type: none"> <li>1. Lying on your side with painful leg on top</li> <li>2. Ensure your leg is in a neutral position</li> <li>3. Tie green band around both ankles</li> <li>4. Slowly lift your leg upwards against band</li> </ol> | Week 1 |  |  |  |  |  |  |  |  |  |  |  |  |  |  |  |  |  |  |
|                                                                                    |                                                                                                                                                                                                                                                          | Week 2 |  |  |  |  |  |  |  |  |  |  |  |  |  |  |  |  |  |  |
|                                                                                    |                                                                                                                                                                                                                                                          | Week 3 |  |  |  |  |  |  |  |  |  |  |  |  |  |  |  |  |  |  |
|                                                                                    |                                                                                                                                                                                                                                                          | Week 4 |  |  |  |  |  |  |  |  |  |  |  |  |  |  |  |  |  |  |
|                                                                                    |                                                                                                                                                                                                                                                          | Week 5 |  |  |  |  |  |  |  |  |  |  |  |  |  |  |  |  |  |  |
|                                                                                    |                                                                                                                                                                                                                                                          | Week 6 |  |  |  |  |  |  |  |  |  |  |  |  |  |  |  |  |  |  |
|                                                                                    |                                                                                                                                                                                                                                                          | Week 7 |  |  |  |  |  |  |  |  |  |  |  |  |  |  |  |  |  |  |

Patient number

|  |  |  |
|--|--|--|
|  |  |  |
|--|--|--|

Date of issue

|   |   |   |   |   |   |
|---|---|---|---|---|---|
| D | D | M | M | Y | Y |
|---|---|---|---|---|---|

**WEEK ONE – Home Exercise Training Diary**

Please perform the marked exercises three times per week (including the supervised session). Mark when the exercises are completed – there are seven boxes, one for each day of the week.

Rest for 2 minutes between sets

| To complete | Exercise                                                                           | Description                                                                                                                                                                                                                                                                   | Week   | Sets | Repetitions | To mark when completed   | % Completed              |                          |                          |                          |                          |  |
|-------------|------------------------------------------------------------------------------------|-------------------------------------------------------------------------------------------------------------------------------------------------------------------------------------------------------------------------------------------------------------------------------|--------|------|-------------|--------------------------|--------------------------|--------------------------|--------------------------|--------------------------|--------------------------|--|
|             |   | <ol style="list-style-type: none"> <li>Lying on your back with knees bent</li> <li>Slowly lift your buttocks off the floor</li> <li>Then slowly lower to the floor</li> </ol>                                                                                                 | Week 1 |      |             | <input type="checkbox"/> | <input type="checkbox"/> | <input type="checkbox"/> | <input type="checkbox"/> | <input type="checkbox"/> | <input type="checkbox"/> |  |
|             |                                                                                    |                                                                                                                                                                                                                                                                               | Week 2 |      |             | <input type="checkbox"/> | <input type="checkbox"/> | <input type="checkbox"/> | <input type="checkbox"/> | <input type="checkbox"/> | <input type="checkbox"/> |  |
|             |                                                                                    |                                                                                                                                                                                                                                                                               | Week 3 |      |             | <input type="checkbox"/> | <input type="checkbox"/> | <input type="checkbox"/> | <input type="checkbox"/> | <input type="checkbox"/> | <input type="checkbox"/> |  |
|             |                                                                                    |                                                                                                                                                                                                                                                                               | Week 4 |      |             | <input type="checkbox"/> | <input type="checkbox"/> | <input type="checkbox"/> | <input type="checkbox"/> | <input type="checkbox"/> | <input type="checkbox"/> |  |
|             |                                                                                    |                                                                                                                                                                                                                                                                               | Week 5 |      |             | <input type="checkbox"/> | <input type="checkbox"/> | <input type="checkbox"/> | <input type="checkbox"/> | <input type="checkbox"/> | <input type="checkbox"/> |  |
|             |                                                                                    |                                                                                                                                                                                                                                                                               | Week 6 |      |             | <input type="checkbox"/> | <input type="checkbox"/> | <input type="checkbox"/> | <input type="checkbox"/> | <input type="checkbox"/> | <input type="checkbox"/> |  |
|             |  | <ol style="list-style-type: none"> <li>Lying on your back with knees bent</li> <li>Bend the non-painful leg to the chest</li> <li>Then with painful leg on the floor, squeeze the buttocks and lift buttocks off the floor</li> <li>Then slowly lower to the floor</li> </ol> | Week 1 |      |             | <input type="checkbox"/> | <input type="checkbox"/> | <input type="checkbox"/> | <input type="checkbox"/> | <input type="checkbox"/> | <input type="checkbox"/> |  |
|             |                                                                                    |                                                                                                                                                                                                                                                                               | Week 2 |      |             | <input type="checkbox"/> | <input type="checkbox"/> | <input type="checkbox"/> | <input type="checkbox"/> | <input type="checkbox"/> | <input type="checkbox"/> |  |
|             |                                                                                    |                                                                                                                                                                                                                                                                               | Week 3 |      |             | <input type="checkbox"/> | <input type="checkbox"/> | <input type="checkbox"/> | <input type="checkbox"/> | <input type="checkbox"/> | <input type="checkbox"/> |  |
|             |                                                                                    |                                                                                                                                                                                                                                                                               | Week 4 |      |             | <input type="checkbox"/> | <input type="checkbox"/> | <input type="checkbox"/> | <input type="checkbox"/> | <input type="checkbox"/> | <input type="checkbox"/> |  |
|             |                                                                                    |                                                                                                                                                                                                                                                                               | Week 5 |      |             | <input type="checkbox"/> | <input type="checkbox"/> | <input type="checkbox"/> | <input type="checkbox"/> | <input type="checkbox"/> | <input type="checkbox"/> |  |
|             |                                                                                    |                                                                                                                                                                                                                                                                               | Week 6 |      |             | <input type="checkbox"/> | <input type="checkbox"/> | <input type="checkbox"/> | <input type="checkbox"/> | <input type="checkbox"/> | <input type="checkbox"/> |  |

Patient number

|  |  |  |
|--|--|--|
|  |  |  |
|--|--|--|

Date of issue

|   |   |   |   |   |   |
|---|---|---|---|---|---|
| D | D | M | M | Y | Y |
|---|---|---|---|---|---|

## WEEK ONE – Home Exercise Training Diary

Please perform the marked exercises three times per week (including the supervised session). Mark when the exercises are completed – there are seven boxes, one for each day of the week.

Rest for 2 minutes between sets

|                                                                                   |                                                                                                                                                                                                                                                                                                                           |        |  |  |  |  |  |  |  |  |  |  |  |  |  |  |  |  |  |  |
|-----------------------------------------------------------------------------------|---------------------------------------------------------------------------------------------------------------------------------------------------------------------------------------------------------------------------------------------------------------------------------------------------------------------------|--------|--|--|--|--|--|--|--|--|--|--|--|--|--|--|--|--|--|--|
|  | <ol style="list-style-type: none"> <li>1. Lying on your back with knees bent</li> <li>2. Bend the non-painful leg to the chest</li> <li>3. Then with painful leg on the floor, squeeze the buttocks and lift buttocks off the floor</li> <li>4. Then slowly lower to the floor</li> <li>5. Hold for 10 seconds</li> </ol> | Week 1 |  |  |  |  |  |  |  |  |  |  |  |  |  |  |  |  |  |  |
|                                                                                   |                                                                                                                                                                                                                                                                                                                           | Week 2 |  |  |  |  |  |  |  |  |  |  |  |  |  |  |  |  |  |  |
|                                                                                   |                                                                                                                                                                                                                                                                                                                           | Week 3 |  |  |  |  |  |  |  |  |  |  |  |  |  |  |  |  |  |  |
|                                                                                   |                                                                                                                                                                                                                                                                                                                           | Week 4 |  |  |  |  |  |  |  |  |  |  |  |  |  |  |  |  |  |  |
|                                                                                   |                                                                                                                                                                                                                                                                                                                           | Week 5 |  |  |  |  |  |  |  |  |  |  |  |  |  |  |  |  |  |  |
|                                                                                   |                                                                                                                                                                                                                                                                                                                           | Week 6 |  |  |  |  |  |  |  |  |  |  |  |  |  |  |  |  |  |  |

Patient number

|  |  |  |
|--|--|--|
|  |  |  |
|--|--|--|

Date of issue

|   |   |   |   |   |   |
|---|---|---|---|---|---|
| D | D | M | M | Y | Y |
|---|---|---|---|---|---|

## WEEK TWO – Home Exercise Training Diary

Please perform the marked exercises three times per week (including the supervised session). Mark when the exercises are completed – there are seven boxes, one for each day of the week.

Rest for 2 minutes between sets

| To complete | Exercise                                                                           | Description                                                                                                                                                                                                                                                                                                                                                                              | Week   | Sets | Repetitions | To mark when completed   | % Completed              |                          |                          |                          |                          |                          |                          |                          |                          |                          |                          |  |
|-------------|------------------------------------------------------------------------------------|------------------------------------------------------------------------------------------------------------------------------------------------------------------------------------------------------------------------------------------------------------------------------------------------------------------------------------------------------------------------------------------|--------|------|-------------|--------------------------|--------------------------|--------------------------|--------------------------|--------------------------|--------------------------|--------------------------|--------------------------|--------------------------|--------------------------|--------------------------|--------------------------|--|
|             |   | <ol style="list-style-type: none"> <li>Lying on your side with painful leg on top</li> <li>Keep ankles and knees together with your thighs at 45 to your body</li> <li>Tie yellow band around the lower thighs</li> <li>Keeping ankles together slowly lift top upwards</li> <li>Keep your pelvis still and ensure you don't rotate the rest of your body</li> </ol> Return to beginning | Week 1 |      |             | <input type="checkbox"/> | <input type="checkbox"/> | <input type="checkbox"/> | <input type="checkbox"/> | <input type="checkbox"/> | <input type="checkbox"/> | <input type="checkbox"/> | <input type="checkbox"/> | <input type="checkbox"/> | <input type="checkbox"/> |                          |                          |  |
|             |                                                                                    |                                                                                                                                                                                                                                                                                                                                                                                          | Week 2 |      |             | <input type="checkbox"/> | <input type="checkbox"/> | <input type="checkbox"/> | <input type="checkbox"/> | <input type="checkbox"/> | <input type="checkbox"/> | <input type="checkbox"/> | <input type="checkbox"/> | <input type="checkbox"/> | <input type="checkbox"/> | <input type="checkbox"/> | <input type="checkbox"/> |  |
|             |                                                                                    |                                                                                                                                                                                                                                                                                                                                                                                          | Week 3 |      |             | <input type="checkbox"/> | <input type="checkbox"/> | <input type="checkbox"/> | <input type="checkbox"/> | <input type="checkbox"/> | <input type="checkbox"/> | <input type="checkbox"/> | <input type="checkbox"/> | <input type="checkbox"/> | <input type="checkbox"/> | <input type="checkbox"/> | <input type="checkbox"/> |  |
|             |                                                                                    |                                                                                                                                                                                                                                                                                                                                                                                          | Week 4 |      |             | <input type="checkbox"/> | <input type="checkbox"/> | <input type="checkbox"/> | <input type="checkbox"/> | <input type="checkbox"/> | <input type="checkbox"/> | <input type="checkbox"/> | <input type="checkbox"/> | <input type="checkbox"/> | <input type="checkbox"/> | <input type="checkbox"/> | <input type="checkbox"/> |  |
|             |                                                                                    |                                                                                                                                                                                                                                                                                                                                                                                          | Week 5 |      |             | <input type="checkbox"/> | <input type="checkbox"/> | <input type="checkbox"/> | <input type="checkbox"/> | <input type="checkbox"/> | <input type="checkbox"/> | <input type="checkbox"/> | <input type="checkbox"/> | <input type="checkbox"/> | <input type="checkbox"/> | <input type="checkbox"/> | <input type="checkbox"/> |  |
|             |                                                                                    |                                                                                                                                                                                                                                                                                                                                                                                          | Week 6 |      |             | <input type="checkbox"/> | <input type="checkbox"/> | <input type="checkbox"/> | <input type="checkbox"/> | <input type="checkbox"/> | <input type="checkbox"/> | <input type="checkbox"/> | <input type="checkbox"/> | <input type="checkbox"/> | <input type="checkbox"/> | <input type="checkbox"/> | <input type="checkbox"/> |  |
|             |  | <ol style="list-style-type: none"> <li>Lying on your side with painful leg on top</li> <li>Keep ankles and knees together with your thighs at 45 to your body</li> <li>Tie red band around the lower thighs</li> <li>Keeping ankles together slowly lift top leg upwards</li> <li>Keep your pelvis still and ensure</li> </ol>                                                           | Week 1 |      |             | <input type="checkbox"/> | <input type="checkbox"/> | <input type="checkbox"/> | <input type="checkbox"/> | <input type="checkbox"/> | <input type="checkbox"/> | <input type="checkbox"/> | <input type="checkbox"/> | <input type="checkbox"/> | <input type="checkbox"/> |                          |                          |  |
|             |                                                                                    |                                                                                                                                                                                                                                                                                                                                                                                          | Week 2 |      |             | <input type="checkbox"/> | <input type="checkbox"/> | <input type="checkbox"/> | <input type="checkbox"/> | <input type="checkbox"/> | <input type="checkbox"/> | <input type="checkbox"/> | <input type="checkbox"/> | <input type="checkbox"/> | <input type="checkbox"/> | <input type="checkbox"/> | <input type="checkbox"/> |  |
|             |                                                                                    |                                                                                                                                                                                                                                                                                                                                                                                          | Week 3 |      |             | <input type="checkbox"/> | <input type="checkbox"/> | <input type="checkbox"/> | <input type="checkbox"/> | <input type="checkbox"/> | <input type="checkbox"/> | <input type="checkbox"/> | <input type="checkbox"/> | <input type="checkbox"/> | <input type="checkbox"/> | <input type="checkbox"/> | <input type="checkbox"/> |  |
|             |                                                                                    |                                                                                                                                                                                                                                                                                                                                                                                          | Week 4 |      |             | <input type="checkbox"/> | <input type="checkbox"/> | <input type="checkbox"/> | <input type="checkbox"/> | <input type="checkbox"/> | <input type="checkbox"/> | <input type="checkbox"/> | <input type="checkbox"/> | <input type="checkbox"/> | <input type="checkbox"/> | <input type="checkbox"/> | <input type="checkbox"/> |  |
|             |                                                                                    |                                                                                                                                                                                                                                                                                                                                                                                          | Week 5 |      |             | <input type="checkbox"/> | <input type="checkbox"/> | <input type="checkbox"/> | <input type="checkbox"/> | <input type="checkbox"/> | <input type="checkbox"/> | <input type="checkbox"/> | <input type="checkbox"/> | <input type="checkbox"/> | <input type="checkbox"/> | <input type="checkbox"/> | <input type="checkbox"/> |  |

Patient Number

|  |  |  |
|--|--|--|
|  |  |  |
|--|--|--|

Date of issue

|   |   |   |   |   |   |
|---|---|---|---|---|---|
| D | D | M | M | Y | Y |
|---|---|---|---|---|---|

## WEEK TWO – Home Exercise Training Diary

Please perform the marked exercises three times per week (including the supervised session). Mark when the exercises are completed – there are seven boxes, one for each day of the week.

Rest for 2 minutes between sets

|  |                                                                                   |                                                                             |        |  |  |  |  |  |  |  |  |  |  |  |  |  |  |
|--|-----------------------------------------------------------------------------------|-----------------------------------------------------------------------------|--------|--|--|--|--|--|--|--|--|--|--|--|--|--|--|
|  |                                                                                   | you don't rotate the rest of your body<br>Return to beginning               | Week 6 |  |  |  |  |  |  |  |  |  |  |  |  |  |  |
|  | 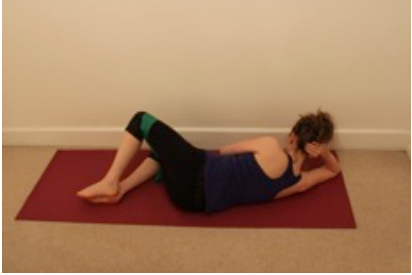 | 1. Lying on your side with painful leg on top                               | Week 1 |  |  |  |  |  |  |  |  |  |  |  |  |  |  |
|  |                                                                                   | 2. Keep ankles and knees together with your thighs at 45 to your body       | Week 2 |  |  |  |  |  |  |  |  |  |  |  |  |  |  |
|  |                                                                                   | 3. Tie green band around the lower thighs                                   | Week 3 |  |  |  |  |  |  |  |  |  |  |  |  |  |  |
|  |                                                                                   | 4. Keeping ankles together slowly lift top leg upwards                      | Week 4 |  |  |  |  |  |  |  |  |  |  |  |  |  |  |
|  |                                                                                   | 5. Keep your pelvis still and ensure you don't rotate the rest of your body | Week 5 |  |  |  |  |  |  |  |  |  |  |  |  |  |  |
|  |                                                                                   | 6. Return to beginning                                                      | Week 6 |  |  |  |  |  |  |  |  |  |  |  |  |  |  |

Patient Number

|  |  |  |
|--|--|--|
|  |  |  |
|--|--|--|

Date of issue

|   |   |   |   |   |   |
|---|---|---|---|---|---|
| D | D | M | M | Y | Y |
|---|---|---|---|---|---|

### WEEK TWO – Home Exercise Training Diary

Please perform the marked exercises three times per week (including the supervised session). Mark when the exercises are completed – there are seven boxes, one for each day of the week.  
Rest for 2 minutes between sets

| To complete | Exercise                                                                            | Description                                                                                                                                                                                                                                                        | Week   | Sets | Repetitions | To mark when completed   | % Completed              |                          |                          |                          |                          |                          |                          |                          |  |
|-------------|-------------------------------------------------------------------------------------|--------------------------------------------------------------------------------------------------------------------------------------------------------------------------------------------------------------------------------------------------------------------|--------|------|-------------|--------------------------|--------------------------|--------------------------|--------------------------|--------------------------|--------------------------|--------------------------|--------------------------|--------------------------|--|
|             |    | <ol style="list-style-type: none"> <li>Lying on your front over a pillow positioned at waist level</li> <li>Keep your leg straight and lift upwards from the hip then return</li> <li>Try not to rotate your body</li> </ol>                                       | Week 1 |      |             | <input type="checkbox"/> | <input type="checkbox"/> | <input type="checkbox"/> | <input type="checkbox"/> | <input type="checkbox"/> | <input type="checkbox"/> | <input type="checkbox"/> | <input type="checkbox"/> |                          |  |
|             |                                                                                     |                                                                                                                                                                                                                                                                    | Week 2 |      |             | <input type="checkbox"/> | <input type="checkbox"/> | <input type="checkbox"/> | <input type="checkbox"/> | <input type="checkbox"/> | <input type="checkbox"/> | <input type="checkbox"/> | <input type="checkbox"/> | <input type="checkbox"/> |  |
|             |                                                                                     |                                                                                                                                                                                                                                                                    | Week 3 |      |             |                          | <input type="checkbox"/> | <input type="checkbox"/> | <input type="checkbox"/> | <input type="checkbox"/> | <input type="checkbox"/> | <input type="checkbox"/> | <input type="checkbox"/> | <input type="checkbox"/> |  |
|             |                                                                                     |                                                                                                                                                                                                                                                                    | Week 4 |      |             |                          | <input type="checkbox"/> | <input type="checkbox"/> | <input type="checkbox"/> | <input type="checkbox"/> | <input type="checkbox"/> | <input type="checkbox"/> | <input type="checkbox"/> | <input type="checkbox"/> |  |
|             |                                                                                     |                                                                                                                                                                                                                                                                    | Week 5 |      |             |                          | <input type="checkbox"/> | <input type="checkbox"/> | <input type="checkbox"/> | <input type="checkbox"/> | <input type="checkbox"/> | <input type="checkbox"/> | <input type="checkbox"/> | <input type="checkbox"/> |  |
|             |                                                                                     |                                                                                                                                                                                                                                                                    | Week 6 |      |             |                          | <input type="checkbox"/> | <input type="checkbox"/> | <input type="checkbox"/> | <input type="checkbox"/> | <input type="checkbox"/> | <input type="checkbox"/> | <input type="checkbox"/> | <input type="checkbox"/> |  |
|             |  | <ol style="list-style-type: none"> <li>Lying on your front over a pillow positioned at waist level</li> <li>Tie yellow band around ankle</li> <li>Keep your leg straight and lift upwards from the hip then return</li> <li>Try not to rotate your body</li> </ol> | Week 1 |      |             | <input type="checkbox"/> | <input type="checkbox"/> | <input type="checkbox"/> | <input type="checkbox"/> | <input type="checkbox"/> | <input type="checkbox"/> | <input type="checkbox"/> | <input type="checkbox"/> |                          |  |
|             |                                                                                     |                                                                                                                                                                                                                                                                    | Week 2 |      |             | <input type="checkbox"/> | <input type="checkbox"/> | <input type="checkbox"/> | <input type="checkbox"/> | <input type="checkbox"/> | <input type="checkbox"/> | <input type="checkbox"/> | <input type="checkbox"/> | <input type="checkbox"/> |  |
|             |                                                                                     |                                                                                                                                                                                                                                                                    | Week 3 |      |             |                          | <input type="checkbox"/> | <input type="checkbox"/> | <input type="checkbox"/> | <input type="checkbox"/> | <input type="checkbox"/> | <input type="checkbox"/> | <input type="checkbox"/> | <input type="checkbox"/> |  |
|             |                                                                                     |                                                                                                                                                                                                                                                                    | Week 4 |      |             |                          | <input type="checkbox"/> | <input type="checkbox"/> | <input type="checkbox"/> | <input type="checkbox"/> | <input type="checkbox"/> | <input type="checkbox"/> | <input type="checkbox"/> | <input type="checkbox"/> |  |
|             |                                                                                     |                                                                                                                                                                                                                                                                    | Week 5 |      |             |                          | <input type="checkbox"/> | <input type="checkbox"/> | <input type="checkbox"/> | <input type="checkbox"/> | <input type="checkbox"/> | <input type="checkbox"/> | <input type="checkbox"/> | <input type="checkbox"/> |  |
|             |                                                                                     |                                                                                                                                                                                                                                                                    | Week 6 |      |             |                          | <input type="checkbox"/> | <input type="checkbox"/> | <input type="checkbox"/> | <input type="checkbox"/> | <input type="checkbox"/> | <input type="checkbox"/> | <input type="checkbox"/> | <input type="checkbox"/> |  |

Patient Number

Date of issue

## WEEK TWO – Home Exercise Training Diary

Please perform the marked exercises three times per week (including the supervised session). Mark when the exercises are completed – there are seven boxes, one for each day of the week.

Rest for 2 minutes between sets

|  |                                                                                    |                                                                                                                                                                                                                                                                               |        |  |  |  |  |  |  |  |  |  |  |  |  |  |  |  |  |  |
|--|------------------------------------------------------------------------------------|-------------------------------------------------------------------------------------------------------------------------------------------------------------------------------------------------------------------------------------------------------------------------------|--------|--|--|--|--|--|--|--|--|--|--|--|--|--|--|--|--|--|
|  |   | <ol style="list-style-type: none"> <li>1. Lying on your front over a pillow positioned at waist level</li> <li>2. Tie red band around ankle</li> <li>3. Keep your leg straight and lift upwards from the hip then return</li> <li>4. Try not to rotate your body</li> </ol>   | Week 1 |  |  |  |  |  |  |  |  |  |  |  |  |  |  |  |  |  |
|  |                                                                                    |                                                                                                                                                                                                                                                                               | Week 2 |  |  |  |  |  |  |  |  |  |  |  |  |  |  |  |  |  |
|  |                                                                                    |                                                                                                                                                                                                                                                                               | Week 3 |  |  |  |  |  |  |  |  |  |  |  |  |  |  |  |  |  |
|  |                                                                                    |                                                                                                                                                                                                                                                                               | Week 4 |  |  |  |  |  |  |  |  |  |  |  |  |  |  |  |  |  |
|  |                                                                                    |                                                                                                                                                                                                                                                                               | Week 5 |  |  |  |  |  |  |  |  |  |  |  |  |  |  |  |  |  |
|  |                                                                                    |                                                                                                                                                                                                                                                                               | Week 6 |  |  |  |  |  |  |  |  |  |  |  |  |  |  |  |  |  |
|  |                                                                                    |                                                                                                                                                                                                                                                                               |        |  |  |  |  |  |  |  |  |  |  |  |  |  |  |  |  |  |
|  |  | <ol style="list-style-type: none"> <li>1. Lying on your front over a pillow positioned at waist level</li> <li>2. Tie green band around ankle</li> <li>3. Keep your leg straight and lift upwards from the hip then return</li> <li>4. Try not to rotate your body</li> </ol> | Week 1 |  |  |  |  |  |  |  |  |  |  |  |  |  |  |  |  |  |
|  |                                                                                    |                                                                                                                                                                                                                                                                               | Week 2 |  |  |  |  |  |  |  |  |  |  |  |  |  |  |  |  |  |
|  |                                                                                    |                                                                                                                                                                                                                                                                               | Week 3 |  |  |  |  |  |  |  |  |  |  |  |  |  |  |  |  |  |
|  |                                                                                    |                                                                                                                                                                                                                                                                               | Week 4 |  |  |  |  |  |  |  |  |  |  |  |  |  |  |  |  |  |
|  |                                                                                    |                                                                                                                                                                                                                                                                               | Week 5 |  |  |  |  |  |  |  |  |  |  |  |  |  |  |  |  |  |
|  |                                                                                    |                                                                                                                                                                                                                                                                               | Week 6 |  |  |  |  |  |  |  |  |  |  |  |  |  |  |  |  |  |
|  |                                                                                    |                                                                                                                                                                                                                                                                               |        |  |  |  |  |  |  |  |  |  |  |  |  |  |  |  |  |  |

Patient Number

|  |  |  |
|--|--|--|
|  |  |  |
|--|--|--|

Date of issue

|   |   |   |   |   |   |
|---|---|---|---|---|---|
| D | D | M | M | Y | Y |
|---|---|---|---|---|---|



## WEEK TWO – Home Exercise Training Diary

Please perform the marked exercises three times per week (including the supervised session). Mark when the exercises are completed – there are seven boxes, one for each day of the week.

Rest for 2 minutes between sets

| To complete | Exercise                                                                            | Description                                                                                                                                                                                                                              | Week   | Sets | Repetitions | To mark when completed | % Completed |  |  |  |  |  |  |  |  |  |  |  |
|-------------|-------------------------------------------------------------------------------------|------------------------------------------------------------------------------------------------------------------------------------------------------------------------------------------------------------------------------------------|--------|------|-------------|------------------------|-------------|--|--|--|--|--|--|--|--|--|--|--|
|             |    | <ol style="list-style-type: none"> <li>Lying on your side with painful leg on top</li> <li>Ensure your leg in neutral position</li> <li>Slowly lift your leg upwards</li> </ol>                                                          | Week 1 |      |             |                        |             |  |  |  |  |  |  |  |  |  |  |  |
|             |                                                                                     |                                                                                                                                                                                                                                          | Week 2 |      |             |                        |             |  |  |  |  |  |  |  |  |  |  |  |
|             |                                                                                     |                                                                                                                                                                                                                                          | Week 3 |      |             |                        |             |  |  |  |  |  |  |  |  |  |  |  |
|             |                                                                                     |                                                                                                                                                                                                                                          | Week 4 |      |             |                        |             |  |  |  |  |  |  |  |  |  |  |  |
|             |                                                                                     |                                                                                                                                                                                                                                          | Week 5 |      |             |                        |             |  |  |  |  |  |  |  |  |  |  |  |
|             |                                                                                     |                                                                                                                                                                                                                                          | Week 6 |      |             |                        |             |  |  |  |  |  |  |  |  |  |  |  |
|             |  | <ol style="list-style-type: none"> <li>Lying on your side with painful leg on top</li> <li>Ensure your leg in neutral position</li> <li>Tie yellow band around both ankles</li> <li>Slowly lift your leg upwards against band</li> </ol> | Week 1 |      |             |                        |             |  |  |  |  |  |  |  |  |  |  |  |
|             |                                                                                     |                                                                                                                                                                                                                                          | Week 2 |      |             |                        |             |  |  |  |  |  |  |  |  |  |  |  |
|             |                                                                                     |                                                                                                                                                                                                                                          | Week 3 |      |             |                        |             |  |  |  |  |  |  |  |  |  |  |  |
|             |                                                                                     |                                                                                                                                                                                                                                          | Week 4 |      |             |                        |             |  |  |  |  |  |  |  |  |  |  |  |
|             |                                                                                     |                                                                                                                                                                                                                                          | Week 5 |      |             |                        |             |  |  |  |  |  |  |  |  |  |  |  |
|             |                                                                                     |                                                                                                                                                                                                                                          | Week 6 |      |             |                        |             |  |  |  |  |  |  |  |  |  |  |  |

Patient Number

|  |  |  |
|--|--|--|
|  |  |  |
|--|--|--|

Date of issue

|   |   |   |   |   |   |
|---|---|---|---|---|---|
| D | D | M | M | Y | Y |
|---|---|---|---|---|---|

## WEEK TWO – Home Exercise Training Diary

Please perform the marked exercises three times per week (including the supervised session). Mark when the exercises are completed – there are seven boxes, one for each day of the week.

Rest for 2 minutes between sets

|  |                                                                                    |                                                                                                                                                                                                                                                    |        |  |  |  |  |  |  |  |  |  |  |  |  |  |  |  |  |
|--|------------------------------------------------------------------------------------|----------------------------------------------------------------------------------------------------------------------------------------------------------------------------------------------------------------------------------------------------|--------|--|--|--|--|--|--|--|--|--|--|--|--|--|--|--|--|
|  |   | <ol style="list-style-type: none"> <li>1. Lying on your side with painful leg on top</li> <li>2. Ensure your leg in neutral position</li> <li>3. Tie red band around both ankles</li> <li>4. Slowly lift your leg upwards against band</li> </ol>  | Week 1 |  |  |  |  |  |  |  |  |  |  |  |  |  |  |  |  |
|  |                                                                                    |                                                                                                                                                                                                                                                    | Week 2 |  |  |  |  |  |  |  |  |  |  |  |  |  |  |  |  |
|  |                                                                                    |                                                                                                                                                                                                                                                    | Week 3 |  |  |  |  |  |  |  |  |  |  |  |  |  |  |  |  |
|  |                                                                                    |                                                                                                                                                                                                                                                    | Week 4 |  |  |  |  |  |  |  |  |  |  |  |  |  |  |  |  |
|  |                                                                                    |                                                                                                                                                                                                                                                    | Week 5 |  |  |  |  |  |  |  |  |  |  |  |  |  |  |  |  |
|  |                                                                                    |                                                                                                                                                                                                                                                    | Week 6 |  |  |  |  |  |  |  |  |  |  |  |  |  |  |  |  |
|  |                                                                                    |                                                                                                                                                                                                                                                    |        |  |  |  |  |  |  |  |  |  |  |  |  |  |  |  |  |
|  |  | <ol style="list-style-type: none"> <li>1. Lying on your side with painful leg on top</li> <li>2. Ensure your leg in neutral position</li> <li>3. Tie green band around both ankle</li> <li>4. Slowly lift your leg upwards against band</li> </ol> | Week 1 |  |  |  |  |  |  |  |  |  |  |  |  |  |  |  |  |
|  |                                                                                    |                                                                                                                                                                                                                                                    | Week 2 |  |  |  |  |  |  |  |  |  |  |  |  |  |  |  |  |
|  |                                                                                    |                                                                                                                                                                                                                                                    | Week 3 |  |  |  |  |  |  |  |  |  |  |  |  |  |  |  |  |
|  |                                                                                    |                                                                                                                                                                                                                                                    | Week 4 |  |  |  |  |  |  |  |  |  |  |  |  |  |  |  |  |
|  |                                                                                    |                                                                                                                                                                                                                                                    | Week 5 |  |  |  |  |  |  |  |  |  |  |  |  |  |  |  |  |
|  |                                                                                    |                                                                                                                                                                                                                                                    | Week 6 |  |  |  |  |  |  |  |  |  |  |  |  |  |  |  |  |
|  |                                                                                    |                                                                                                                                                                                                                                                    |        |  |  |  |  |  |  |  |  |  |  |  |  |  |  |  |  |

Patient Number

|  |  |  |
|--|--|--|
|  |  |  |
|--|--|--|

Date of issue

|   |   |   |   |   |   |
|---|---|---|---|---|---|
| D | D | M | M | Y | Y |
|---|---|---|---|---|---|

## WEEK TWO – Home Exercise Training Diary

Please perform the marked exercises three times per week (including the supervised session). Mark when the exercises are completed – there are seven boxes, one for each day of the week.

Rest for 2 minutes between sets

| To complete | Exercise                                                                            | Description                                                                                                                                                                                                                                                                                                                                                                                       | Week   | Sets | Repetitions | To mark when completed | % Completed |  |  |  |  |  |  |  |  |  |  |  |  |  |
|-------------|-------------------------------------------------------------------------------------|---------------------------------------------------------------------------------------------------------------------------------------------------------------------------------------------------------------------------------------------------------------------------------------------------------------------------------------------------------------------------------------------------|--------|------|-------------|------------------------|-------------|--|--|--|--|--|--|--|--|--|--|--|--|--|
|             |    | <ol style="list-style-type: none"> <li>Lying on your side with painful leg on top</li> <li>Keep ankles and knees together with your thighs at 45 to your body</li> <li>Tie yellow band around the lower thighs</li> <li>Keeping ankles together slowly lift top upwards</li> <li>Keep your pelvis still and ensure you don't rotate the rest of your body</li> <li>Return to beginning</li> </ol> | Week 1 |      |             |                        |             |  |  |  |  |  |  |  |  |  |  |  |  |  |
|             |                                                                                     |                                                                                                                                                                                                                                                                                                                                                                                                   | Week 2 |      |             |                        |             |  |  |  |  |  |  |  |  |  |  |  |  |  |
|             |                                                                                     |                                                                                                                                                                                                                                                                                                                                                                                                   | Week 3 |      |             |                        |             |  |  |  |  |  |  |  |  |  |  |  |  |  |
|             |                                                                                     |                                                                                                                                                                                                                                                                                                                                                                                                   | Week 4 |      |             |                        |             |  |  |  |  |  |  |  |  |  |  |  |  |  |
|             |                                                                                     |                                                                                                                                                                                                                                                                                                                                                                                                   | Week 5 |      |             |                        |             |  |  |  |  |  |  |  |  |  |  |  |  |  |
|             |                                                                                     |                                                                                                                                                                                                                                                                                                                                                                                                   | Week 6 |      |             |                        |             |  |  |  |  |  |  |  |  |  |  |  |  |  |
|             |  | <ol style="list-style-type: none"> <li>Lying on your side with painful leg on top</li> <li>Keep ankles and knees together with your thighs at 45 to your body</li> <li>Tie red band around the lower thighs</li> <li>Keeping ankles together slowly lift top leg upwards</li> <li>Keep your pelvis still and ensure you don't rotate the rest of your body</li> </ol>                             | Week 1 |      |             |                        |             |  |  |  |  |  |  |  |  |  |  |  |  |  |
|             |                                                                                     |                                                                                                                                                                                                                                                                                                                                                                                                   | Week 2 |      |             |                        |             |  |  |  |  |  |  |  |  |  |  |  |  |  |
|             |                                                                                     |                                                                                                                                                                                                                                                                                                                                                                                                   | Week 3 |      |             |                        |             |  |  |  |  |  |  |  |  |  |  |  |  |  |
|             |                                                                                     |                                                                                                                                                                                                                                                                                                                                                                                                   | Week 4 |      |             |                        |             |  |  |  |  |  |  |  |  |  |  |  |  |  |
|             |                                                                                     |                                                                                                                                                                                                                                                                                                                                                                                                   | Week 5 |      |             |                        |             |  |  |  |  |  |  |  |  |  |  |  |  |  |
|             |                                                                                     |                                                                                                                                                                                                                                                                                                                                                                                                   | Week 6 |      |             |                        |             |  |  |  |  |  |  |  |  |  |  |  |  |  |

Patient Number

|  |  |  |
|--|--|--|
|  |  |  |
|--|--|--|

Date of issue

|   |   |   |   |   |   |
|---|---|---|---|---|---|
| D | D | M | M | Y | Y |
|---|---|---|---|---|---|

**WEEK TWO – Home Exercise Training Diary**

Please perform the marked exercises three times per week (including the supervised session). Mark when the exercises are completed – there are seven boxes, one for each day of the week.

Rest for 2 minutes between sets

|  |                                                                                   |                                                                             |        |  |  |  |  |  |  |  |  |  |  |  |  |  |  |  |
|--|-----------------------------------------------------------------------------------|-----------------------------------------------------------------------------|--------|--|--|--|--|--|--|--|--|--|--|--|--|--|--|--|
|  |                                                                                   | 6. Return to beginning                                                      |        |  |  |  |  |  |  |  |  |  |  |  |  |  |  |  |
|  |  | 1. Lying on your side with painful leg on top                               | Week 1 |  |  |  |  |  |  |  |  |  |  |  |  |  |  |  |
|  |                                                                                   | 2. Keep ankles and knees together with your thighs at 45 to your body       | Week 2 |  |  |  |  |  |  |  |  |  |  |  |  |  |  |  |
|  |                                                                                   | 3. Tie green band around the lower thighs                                   | Week 3 |  |  |  |  |  |  |  |  |  |  |  |  |  |  |  |
|  |                                                                                   | 4. Keeping ankles together slowly lift top leg upwards                      | Week 4 |  |  |  |  |  |  |  |  |  |  |  |  |  |  |  |
|  |                                                                                   | 5. Keep your pelvis still and ensure you don't rotate the rest of your body | Week 5 |  |  |  |  |  |  |  |  |  |  |  |  |  |  |  |
|  |                                                                                   | 6. Return to beginning                                                      | Week 6 |  |  |  |  |  |  |  |  |  |  |  |  |  |  |  |

Patient Number

|  |  |  |
|--|--|--|
|  |  |  |
|--|--|--|

Date of issue

|   |   |   |   |   |   |
|---|---|---|---|---|---|
| D | D | M | M | Y | Y |
|---|---|---|---|---|---|

**WEEK THREE – Home Exercise Training Diary**

Please perform the marked exercises three times per week (including the supervised session). Mark when the exercises are completed – there are seven boxes, one for each day of the week.

Rest for 2 minutes between sets

| To complete | Exercise                                                                           | Description                                                                                                                                                                                                                                                        | Week   | Sets | Repetitions | To mark when completed   | % Completed |
|-------------|------------------------------------------------------------------------------------|--------------------------------------------------------------------------------------------------------------------------------------------------------------------------------------------------------------------------------------------------------------------|--------|------|-------------|--------------------------|-------------|
|             |   | <ol style="list-style-type: none"> <li>Lying on your front over a pillow positioned at waist level</li> <li>Keep your leg straight and lift upwards from the hip then return</li> <li>Try not to rotate your body</li> </ol>                                       | Week 1 |      |             | <input type="checkbox"/> |             |
|             |                                                                                    |                                                                                                                                                                                                                                                                    | Week 2 |      |             | <input type="checkbox"/> |             |
|             |                                                                                    |                                                                                                                                                                                                                                                                    | Week 3 |      |             | <input type="checkbox"/> |             |
|             |                                                                                    |                                                                                                                                                                                                                                                                    | Week 4 |      |             | <input type="checkbox"/> |             |
|             |                                                                                    |                                                                                                                                                                                                                                                                    | Week 5 |      |             | <input type="checkbox"/> |             |
|             |                                                                                    |                                                                                                                                                                                                                                                                    | Week 6 |      |             | <input type="checkbox"/> |             |
|             |  | <ol style="list-style-type: none"> <li>Lying on your front over a pillow positioned at waist level</li> <li>Tie yellow band around ankle</li> <li>Keep your leg straight and lift upwards from the hip then return</li> <li>Try not to rotate your body</li> </ol> | Week 1 |      |             | <input type="checkbox"/> |             |
|             |                                                                                    |                                                                                                                                                                                                                                                                    | Week 2 |      |             | <input type="checkbox"/> |             |
|             |                                                                                    |                                                                                                                                                                                                                                                                    | Week 3 |      |             | <input type="checkbox"/> |             |
|             |                                                                                    |                                                                                                                                                                                                                                                                    | Week 4 |      |             | <input type="checkbox"/> |             |
|             |                                                                                    |                                                                                                                                                                                                                                                                    | Week 5 |      |             | <input type="checkbox"/> |             |

Patient Number

|  |  |  |
|--|--|--|
|  |  |  |
|--|--|--|

Date of issue

|   |   |   |   |   |   |
|---|---|---|---|---|---|
| D | D | M | M | Y | Y |
|---|---|---|---|---|---|

### WEEK THREE – Home Exercise Training Diary

Please perform the marked exercises three times per week (including the supervised session). Mark when the exercises are completed – there are seven boxes, one for each day of the week.

Rest for 2 minutes between sets

|  |                                                                                   |                                                                                                                                                                                                                                                                             |                                                                                    |                                                                                                                                                                                                                                                                               |        |  |  |  |  |  |  |  |  |  |  |  |  |  |  |  |
|--|-----------------------------------------------------------------------------------|-----------------------------------------------------------------------------------------------------------------------------------------------------------------------------------------------------------------------------------------------------------------------------|------------------------------------------------------------------------------------|-------------------------------------------------------------------------------------------------------------------------------------------------------------------------------------------------------------------------------------------------------------------------------|--------|--|--|--|--|--|--|--|--|--|--|--|--|--|--|--|
|  |                                                                                   |                                                                                                                                                                                                                                                                             | Week 6                                                                             |                                                                                                                                                                                                                                                                               |        |  |  |  |  |  |  |  |  |  |  |  |  |  |  |  |
|  |  | <ol style="list-style-type: none"> <li>1. Lying on your front over a pillow positioned at waist level</li> <li>2. Tie red band around ankle</li> <li>3. Keep your leg straight and lift upwards from the hip then return</li> <li>4. Try not to rotate your body</li> </ol> | Week 1                                                                             |                                                                                                                                                                                                                                                                               |        |  |  |  |  |  |  |  |  |  |  |  |  |  |  |  |
|  |                                                                                   |                                                                                                                                                                                                                                                                             | Week 2                                                                             |                                                                                                                                                                                                                                                                               |        |  |  |  |  |  |  |  |  |  |  |  |  |  |  |  |
|  |                                                                                   |                                                                                                                                                                                                                                                                             | Week 3                                                                             |                                                                                                                                                                                                                                                                               |        |  |  |  |  |  |  |  |  |  |  |  |  |  |  |  |
|  |                                                                                   |                                                                                                                                                                                                                                                                             | Week 4                                                                             |                                                                                                                                                                                                                                                                               |        |  |  |  |  |  |  |  |  |  |  |  |  |  |  |  |
|  |                                                                                   |                                                                                                                                                                                                                                                                             | Week 5                                                                             |                                                                                                                                                                                                                                                                               |        |  |  |  |  |  |  |  |  |  |  |  |  |  |  |  |
|  |                                                                                   |                                                                                                                                                                                                                                                                             | Week 6                                                                             |                                                                                                                                                                                                                                                                               |        |  |  |  |  |  |  |  |  |  |  |  |  |  |  |  |
|  |                                                                                   |                                                                                                                                                                                                                                                                             |  | <ol style="list-style-type: none"> <li>1. Lying on your front over a pillow positioned at waist level</li> <li>2. Tie green band around ankle</li> <li>3. Keep your leg straight and lift upwards from the hip then return</li> <li>4. Try not to rotate your body</li> </ol> | Week 1 |  |  |  |  |  |  |  |  |  |  |  |  |  |  |  |
|  | Week 2                                                                            |                                                                                                                                                                                                                                                                             |                                                                                    |                                                                                                                                                                                                                                                                               |        |  |  |  |  |  |  |  |  |  |  |  |  |  |  |  |
|  | Week 3                                                                            |                                                                                                                                                                                                                                                                             |                                                                                    |                                                                                                                                                                                                                                                                               |        |  |  |  |  |  |  |  |  |  |  |  |  |  |  |  |
|  | Week 4                                                                            |                                                                                                                                                                                                                                                                             |                                                                                    |                                                                                                                                                                                                                                                                               |        |  |  |  |  |  |  |  |  |  |  |  |  |  |  |  |
|  | Week 5                                                                            |                                                                                                                                                                                                                                                                             |                                                                                    |                                                                                                                                                                                                                                                                               |        |  |  |  |  |  |  |  |  |  |  |  |  |  |  |  |
|  | Week 6                                                                            |                                                                                                                                                                                                                                                                             |                                                                                    |                                                                                                                                                                                                                                                                               |        |  |  |  |  |  |  |  |  |  |  |  |  |  |  |  |

Patient Number

|  |  |  |
|--|--|--|
|  |  |  |
|--|--|--|

Date of issue

|   |   |   |   |   |   |
|---|---|---|---|---|---|
| D | D | M | M | Y | Y |
|---|---|---|---|---|---|

### WEEK THREE – Home Exercise Training Diary

Please perform the marked exercises three times per week (including the supervised session). Mark when the exercises are completed – there are seven boxes, one for each day of the week.

Rest for 2 minutes between sets

| To complete | Exercise                                                                          | Description                                                                                                                                                                                                                                                                                          | Week                                                                               | Sets                                                                                                                                                                                                                                                                                                                                                                                    | Repetitions | To mark when completed |  |  |  |  |  |  | % Completed |  |
|-------------|-----------------------------------------------------------------------------------|------------------------------------------------------------------------------------------------------------------------------------------------------------------------------------------------------------------------------------------------------------------------------------------------------|------------------------------------------------------------------------------------|-----------------------------------------------------------------------------------------------------------------------------------------------------------------------------------------------------------------------------------------------------------------------------------------------------------------------------------------------------------------------------------------|-------------|------------------------|--|--|--|--|--|--|-------------|--|
|             |                                                                                   |                                                                                                                                                                                                                                                                                                      |                                                                                    |                                                                                                                                                                                                                                                                                                                                                                                         |             |                        |  |  |  |  |  |  |             |  |
|             | 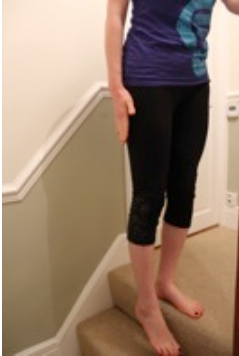 | <ol style="list-style-type: none"> <li>1. Standing on the lateral step on your painful leg (use support if necessary)</li> <li>2. With the non-painful leg let this drop towards the floor</li> <li>4. Tighten buttocks on painful leg side, lifting your non-painful leg back to neutral</li> </ol> | Week 1                                                                             |                                                                                                                                                                                                                                                                                                                                                                                         |             |                        |  |  |  |  |  |  |             |  |
|             |                                                                                   |                                                                                                                                                                                                                                                                                                      | Week 2                                                                             |                                                                                                                                                                                                                                                                                                                                                                                         |             |                        |  |  |  |  |  |  |             |  |
|             |                                                                                   |                                                                                                                                                                                                                                                                                                      | Week 3                                                                             |                                                                                                                                                                                                                                                                                                                                                                                         |             |                        |  |  |  |  |  |  |             |  |
|             |                                                                                   |                                                                                                                                                                                                                                                                                                      | Week 4                                                                             |                                                                                                                                                                                                                                                                                                                                                                                         |             |                        |  |  |  |  |  |  |             |  |
|             |                                                                                   |                                                                                                                                                                                                                                                                                                      | Week 5                                                                             |                                                                                                                                                                                                                                                                                                                                                                                         |             |                        |  |  |  |  |  |  |             |  |
|             |                                                                                   |                                                                                                                                                                                                                                                                                                      | Week 6                                                                             |                                                                                                                                                                                                                                                                                                                                                                                         |             |                        |  |  |  |  |  |  |             |  |
|             |                                                                                   |                                                                                                                                                                                                                                                                                                      |  | <ol style="list-style-type: none"> <li>1. Standing on the lateral step on your painful leg (use support if necessary)</li> <li>2. Secure the yellow theraband to the floor with a weight e.g. heavy book</li> <li>3. With the non-painful leg let this drop towards the floor</li> <li>4. Tighten buttocks on painful leg side, lifting your non-painful leg back to neutral</li> </ol> | Week 1      |                        |  |  |  |  |  |  |             |  |
|             | Week 2                                                                            |                                                                                                                                                                                                                                                                                                      |                                                                                    |                                                                                                                                                                                                                                                                                                                                                                                         |             |                        |  |  |  |  |  |  |             |  |
|             | Week 3                                                                            |                                                                                                                                                                                                                                                                                                      |                                                                                    |                                                                                                                                                                                                                                                                                                                                                                                         |             |                        |  |  |  |  |  |  |             |  |
|             | Week 4                                                                            |                                                                                                                                                                                                                                                                                                      |                                                                                    |                                                                                                                                                                                                                                                                                                                                                                                         |             |                        |  |  |  |  |  |  |             |  |
|             | Week 5                                                                            |                                                                                                                                                                                                                                                                                                      |                                                                                    |                                                                                                                                                                                                                                                                                                                                                                                         |             |                        |  |  |  |  |  |  |             |  |
|             | Week 6                                                                            |                                                                                                                                                                                                                                                                                                      |                                                                                    |                                                                                                                                                                                                                                                                                                                                                                                         |             |                        |  |  |  |  |  |  |             |  |

Patient Number

|  |  |  |
|--|--|--|
|  |  |  |
|--|--|--|

Date of issue

|   |   |   |   |   |   |
|---|---|---|---|---|---|
| D | D | M | M | Y | Y |
|---|---|---|---|---|---|

**WEEK THREE – Home Exercise Training Diary**

Please perform the marked exercises three times per week (including the supervised session). Mark when the exercises are completed – there are seven boxes, one for each day of the week.

Rest for 2 minutes between sets

|                                                                                    |                                                                                                                                                                                                                                                                                                                                                                                        |        |  |  |  |  |  |  |  |  |  |  |  |  |  |  |  |  |  |
|------------------------------------------------------------------------------------|----------------------------------------------------------------------------------------------------------------------------------------------------------------------------------------------------------------------------------------------------------------------------------------------------------------------------------------------------------------------------------------|--------|--|--|--|--|--|--|--|--|--|--|--|--|--|--|--|--|--|
|   | <ol style="list-style-type: none"> <li>1. Standing on the lateral step on your painful leg (use support if necessary)</li> <li>2. Secure the red theraband to the floor with a weight e.g. heavy book</li> <li>3. With the non-painful leg let this drop towards the floor</li> <li>4. Tighten buttocks on painful leg side, lifting your non-painful leg back to neutral</li> </ol>   | Week 1 |  |  |  |  |  |  |  |  |  |  |  |  |  |  |  |  |  |
|                                                                                    |                                                                                                                                                                                                                                                                                                                                                                                        | Week 2 |  |  |  |  |  |  |  |  |  |  |  |  |  |  |  |  |  |
|                                                                                    |                                                                                                                                                                                                                                                                                                                                                                                        | Week 3 |  |  |  |  |  |  |  |  |  |  |  |  |  |  |  |  |  |
|                                                                                    |                                                                                                                                                                                                                                                                                                                                                                                        | Week 4 |  |  |  |  |  |  |  |  |  |  |  |  |  |  |  |  |  |
|                                                                                    |                                                                                                                                                                                                                                                                                                                                                                                        | Week 5 |  |  |  |  |  |  |  |  |  |  |  |  |  |  |  |  |  |
|                                                                                    |                                                                                                                                                                                                                                                                                                                                                                                        | Week 6 |  |  |  |  |  |  |  |  |  |  |  |  |  |  |  |  |  |
|                                                                                    |                                                                                                                                                                                                                                                                                                                                                                                        |        |  |  |  |  |  |  |  |  |  |  |  |  |  |  |  |  |  |
|  | <ol style="list-style-type: none"> <li>1. Standing on the lateral step on your painful leg (use support if necessary)</li> <li>2. Secure the green theraband to the floor with a weight e.g. heavy book</li> <li>3. With the non-painful leg let this drop towards the floor</li> <li>4. Tighten buttocks on painful leg side, lifting your non-painful leg back to neutral</li> </ol> | Week 1 |  |  |  |  |  |  |  |  |  |  |  |  |  |  |  |  |  |
|                                                                                    |                                                                                                                                                                                                                                                                                                                                                                                        | Week 2 |  |  |  |  |  |  |  |  |  |  |  |  |  |  |  |  |  |
|                                                                                    |                                                                                                                                                                                                                                                                                                                                                                                        | Week 3 |  |  |  |  |  |  |  |  |  |  |  |  |  |  |  |  |  |
|                                                                                    |                                                                                                                                                                                                                                                                                                                                                                                        | Week 4 |  |  |  |  |  |  |  |  |  |  |  |  |  |  |  |  |  |
|                                                                                    |                                                                                                                                                                                                                                                                                                                                                                                        | Week 5 |  |  |  |  |  |  |  |  |  |  |  |  |  |  |  |  |  |
|                                                                                    |                                                                                                                                                                                                                                                                                                                                                                                        | Week 6 |  |  |  |  |  |  |  |  |  |  |  |  |  |  |  |  |  |
|                                                                                    |                                                                                                                                                                                                                                                                                                                                                                                        |        |  |  |  |  |  |  |  |  |  |  |  |  |  |  |  |  |  |

Patient Number

|  |  |  |
|--|--|--|
|  |  |  |
|--|--|--|

Date of issue

|   |   |   |   |   |   |
|---|---|---|---|---|---|
| D | D | M | M | Y | Y |
|---|---|---|---|---|---|



### WEEK THREE – Home Exercise Training Diary

Please perform the marked exercises three times per week (including the supervised session). Mark when the exercises are completed – there are seven boxes, one for each day of the week.

Rest for 2 minutes between sets

| To complete | Exercise                                                                           | Description                                                                                                                                                                                                                                                                | Week   | Sets | Repetitions | To mark when completed   | % Completed              |                          |                          |                          |                          |                          |                          |                          |                          |                          |                          |                          |                          |  |
|-------------|------------------------------------------------------------------------------------|----------------------------------------------------------------------------------------------------------------------------------------------------------------------------------------------------------------------------------------------------------------------------|--------|------|-------------|--------------------------|--------------------------|--------------------------|--------------------------|--------------------------|--------------------------|--------------------------|--------------------------|--------------------------|--------------------------|--------------------------|--------------------------|--------------------------|--------------------------|--|
|             |   | <ol style="list-style-type: none"> <li>1. Standing on your painful leg with your non-painful leg against a wall</li> <li>2. Bend your non-painful knee up and push into the wall</li> <li>3. Keep the leg and pelvis in neutral</li> <li>4. Push and then relax</li> </ol> | Week 1 |      |             | <input type="checkbox"/> | <input type="checkbox"/> | <input type="checkbox"/> | <input type="checkbox"/> | <input type="checkbox"/> | <input type="checkbox"/> | <input type="checkbox"/> | <input type="checkbox"/> | <input type="checkbox"/> | <input type="checkbox"/> |                          |                          |                          |                          |  |
|             |                                                                                    |                                                                                                                                                                                                                                                                            | Week 2 |      |             | <input type="checkbox"/> | <input type="checkbox"/> | <input type="checkbox"/> | <input type="checkbox"/> | <input type="checkbox"/> | <input type="checkbox"/> | <input type="checkbox"/> | <input type="checkbox"/> | <input type="checkbox"/> | <input type="checkbox"/> | <input type="checkbox"/> | <input type="checkbox"/> |                          |                          |  |
|             |                                                                                    |                                                                                                                                                                                                                                                                            | Week 3 |      |             |                          | <input type="checkbox"/> | <input type="checkbox"/> | <input type="checkbox"/> | <input type="checkbox"/> | <input type="checkbox"/> | <input type="checkbox"/> | <input type="checkbox"/> | <input type="checkbox"/> | <input type="checkbox"/> | <input type="checkbox"/> | <input type="checkbox"/> | <input type="checkbox"/> |                          |  |
|             |                                                                                    |                                                                                                                                                                                                                                                                            | Week 4 |      |             |                          | <input type="checkbox"/> | <input type="checkbox"/> | <input type="checkbox"/> | <input type="checkbox"/> | <input type="checkbox"/> | <input type="checkbox"/> | <input type="checkbox"/> | <input type="checkbox"/> | <input type="checkbox"/> | <input type="checkbox"/> | <input type="checkbox"/> | <input type="checkbox"/> |                          |  |
|             |                                                                                    |                                                                                                                                                                                                                                                                            | Week 5 |      |             |                          | <input type="checkbox"/> | <input type="checkbox"/> | <input type="checkbox"/> | <input type="checkbox"/> | <input type="checkbox"/> | <input type="checkbox"/> | <input type="checkbox"/> | <input type="checkbox"/> | <input type="checkbox"/> | <input type="checkbox"/> | <input type="checkbox"/> | <input type="checkbox"/> |                          |  |
|             |                                                                                    |                                                                                                                                                                                                                                                                            | Week 6 |      |             |                          | <input type="checkbox"/> | <input type="checkbox"/> | <input type="checkbox"/> | <input type="checkbox"/> | <input type="checkbox"/> | <input type="checkbox"/> | <input type="checkbox"/> | <input type="checkbox"/> | <input type="checkbox"/> | <input type="checkbox"/> | <input type="checkbox"/> | <input type="checkbox"/> |                          |  |
|             |  | <ol style="list-style-type: none"> <li>1. Standing on your painful leg with your non-painful leg against a wall</li> <li>2. Bend your non-painful knee up and push into the wall</li> <li>3. Keep the leg and pelvis in neutral</li> <li>4. Hold 15 seconds</li> </ol>     | Week 1 |      |             | <input type="checkbox"/> | <input type="checkbox"/> | <input type="checkbox"/> | <input type="checkbox"/> | <input type="checkbox"/> | <input type="checkbox"/> | <input type="checkbox"/> | <input type="checkbox"/> | <input type="checkbox"/> | <input type="checkbox"/> | <input type="checkbox"/> |                          |                          |                          |  |
|             |                                                                                    |                                                                                                                                                                                                                                                                            | Week 2 |      |             | <input type="checkbox"/> | <input type="checkbox"/> | <input type="checkbox"/> | <input type="checkbox"/> | <input type="checkbox"/> | <input type="checkbox"/> | <input type="checkbox"/> | <input type="checkbox"/> | <input type="checkbox"/> | <input type="checkbox"/> | <input type="checkbox"/> | <input type="checkbox"/> | <input type="checkbox"/> |                          |  |
|             |                                                                                    |                                                                                                                                                                                                                                                                            | Week 3 |      |             |                          | <input type="checkbox"/> | <input type="checkbox"/> | <input type="checkbox"/> | <input type="checkbox"/> | <input type="checkbox"/> | <input type="checkbox"/> | <input type="checkbox"/> | <input type="checkbox"/> | <input type="checkbox"/> | <input type="checkbox"/> | <input type="checkbox"/> | <input type="checkbox"/> |                          |  |
|             |                                                                                    |                                                                                                                                                                                                                                                                            | Week 4 |      |             |                          | <input type="checkbox"/> | <input type="checkbox"/> | <input type="checkbox"/> | <input type="checkbox"/> | <input type="checkbox"/> | <input type="checkbox"/> | <input type="checkbox"/> | <input type="checkbox"/> | <input type="checkbox"/> | <input type="checkbox"/> | <input type="checkbox"/> | <input type="checkbox"/> | <input type="checkbox"/> |  |
|             |                                                                                    |                                                                                                                                                                                                                                                                            | Week 5 |      |             |                          | <input type="checkbox"/> | <input type="checkbox"/> | <input type="checkbox"/> | <input type="checkbox"/> | <input type="checkbox"/> | <input type="checkbox"/> | <input type="checkbox"/> | <input type="checkbox"/> | <input type="checkbox"/> | <input type="checkbox"/> | <input type="checkbox"/> | <input type="checkbox"/> | <input type="checkbox"/> |  |

Patient Number

|  |  |  |
|--|--|--|
|  |  |  |
|--|--|--|

Date of issue

|   |   |   |   |   |   |
|---|---|---|---|---|---|
| D | D | M | M | Y | Y |
|---|---|---|---|---|---|

### WEEK THREE – Home Exercise Training Diary

Please perform the marked exercises three times per week (including the supervised session). Mark when the exercises are completed – there are seven boxes, one for each day of the week.

Rest for 2 minutes between sets

|  |                                                                                   |                                                                                                                                                                                                                                                                        |        |  |  |  |  |  |  |  |  |  |  |  |  |  |  |  |  |
|--|-----------------------------------------------------------------------------------|------------------------------------------------------------------------------------------------------------------------------------------------------------------------------------------------------------------------------------------------------------------------|--------|--|--|--|--|--|--|--|--|--|--|--|--|--|--|--|--|
|  |                                                                                   |                                                                                                                                                                                                                                                                        | Week 6 |  |  |  |  |  |  |  |  |  |  |  |  |  |  |  |  |
|  |  | <ol style="list-style-type: none"> <li>1. Standing on your painful leg with your non-painful leg against a wall</li> <li>2. Bend your non-painful knee up and push into the wall</li> <li>3. Keep the leg and pelvis in neutral</li> <li>4. Hold 30 seconds</li> </ol> | Week 1 |  |  |  |  |  |  |  |  |  |  |  |  |  |  |  |  |
|  |                                                                                   |                                                                                                                                                                                                                                                                        | Week 2 |  |  |  |  |  |  |  |  |  |  |  |  |  |  |  |  |
|  |                                                                                   |                                                                                                                                                                                                                                                                        | Week 3 |  |  |  |  |  |  |  |  |  |  |  |  |  |  |  |  |
|  |                                                                                   |                                                                                                                                                                                                                                                                        | Week 4 |  |  |  |  |  |  |  |  |  |  |  |  |  |  |  |  |
|  |                                                                                   |                                                                                                                                                                                                                                                                        | Week 5 |  |  |  |  |  |  |  |  |  |  |  |  |  |  |  |  |
|  |                                                                                   |                                                                                                                                                                                                                                                                        | Week 6 |  |  |  |  |  |  |  |  |  |  |  |  |  |  |  |  |

Patient Number

|  |  |  |
|--|--|--|
|  |  |  |
|--|--|--|

Date of issue

|   |   |   |   |   |   |
|---|---|---|---|---|---|
| D | D | M | M | Y | Y |
|---|---|---|---|---|---|

### WEEK FOUR- Home Exercise Training Diary

Please perform the marked exercises three times per week (including the supervised session). Mark when the exercises are completed - there are seven boxes, one for each day of the week.

Rest for 2 minutes between sets

| To complete | Exercise                                                                           | Description                                                                                                                                                                                                                                                 | Week   | Sets | Repetitions | To mark when completed   | % Completed              |                          |                          |                          |                          |                          |                          |                          |                          |                          |                          |  |
|-------------|------------------------------------------------------------------------------------|-------------------------------------------------------------------------------------------------------------------------------------------------------------------------------------------------------------------------------------------------------------|--------|------|-------------|--------------------------|--------------------------|--------------------------|--------------------------|--------------------------|--------------------------|--------------------------|--------------------------|--------------------------|--------------------------|--------------------------|--------------------------|--|
|             |   | <ol style="list-style-type: none"> <li>1. Standing upright supported with a slight forward lean</li> <li>2. Slowly take the painful leg backwards at the hip</li> <li>3. Try not rotate the body</li> </ol>                                                 | Week 1 |      |             | <input type="checkbox"/> | <input type="checkbox"/> | <input type="checkbox"/> | <input type="checkbox"/> | <input type="checkbox"/> | <input type="checkbox"/> | <input type="checkbox"/> | <input type="checkbox"/> | <input type="checkbox"/> | <input type="checkbox"/> |                          |                          |  |
|             |                                                                                    |                                                                                                                                                                                                                                                             | Week 2 |      |             | <input type="checkbox"/> | <input type="checkbox"/> | <input type="checkbox"/> | <input type="checkbox"/> | <input type="checkbox"/> | <input type="checkbox"/> | <input type="checkbox"/> | <input type="checkbox"/> | <input type="checkbox"/> | <input type="checkbox"/> | <input type="checkbox"/> |                          |  |
|             |                                                                                    |                                                                                                                                                                                                                                                             | Week 3 |      |             |                          | <input type="checkbox"/> | <input type="checkbox"/> | <input type="checkbox"/> | <input type="checkbox"/> | <input type="checkbox"/> | <input type="checkbox"/> | <input type="checkbox"/> | <input type="checkbox"/> | <input type="checkbox"/> | <input type="checkbox"/> | <input type="checkbox"/> |  |
|             |                                                                                    |                                                                                                                                                                                                                                                             | Week 4 |      |             |                          | <input type="checkbox"/> | <input type="checkbox"/> | <input type="checkbox"/> | <input type="checkbox"/> | <input type="checkbox"/> | <input type="checkbox"/> | <input type="checkbox"/> | <input type="checkbox"/> | <input type="checkbox"/> | <input type="checkbox"/> | <input type="checkbox"/> |  |
|             |                                                                                    |                                                                                                                                                                                                                                                             | Week 5 |      |             |                          | <input type="checkbox"/> | <input type="checkbox"/> | <input type="checkbox"/> | <input type="checkbox"/> | <input type="checkbox"/> | <input type="checkbox"/> | <input type="checkbox"/> | <input type="checkbox"/> | <input type="checkbox"/> | <input type="checkbox"/> | <input type="checkbox"/> |  |
|             |                                                                                    |                                                                                                                                                                                                                                                             | Week 6 |      |             |                          | <input type="checkbox"/> | <input type="checkbox"/> | <input type="checkbox"/> | <input type="checkbox"/> | <input type="checkbox"/> | <input type="checkbox"/> | <input type="checkbox"/> | <input type="checkbox"/> | <input type="checkbox"/> | <input type="checkbox"/> | <input type="checkbox"/> |  |
|             |  | <ol style="list-style-type: none"> <li>1. Standing upright supported with a slight forward lean</li> <li>2. Tie a yellow band around the ankles</li> <li>3. Slowly take the painful leg backwards at the hip</li> <li>4. Try not rotate the body</li> </ol> | Week 1 |      |             | <input type="checkbox"/> | <input type="checkbox"/> | <input type="checkbox"/> | <input type="checkbox"/> | <input type="checkbox"/> | <input type="checkbox"/> | <input type="checkbox"/> | <input type="checkbox"/> | <input type="checkbox"/> | <input type="checkbox"/> |                          |                          |  |
|             |                                                                                    |                                                                                                                                                                                                                                                             | Week 2 |      |             | <input type="checkbox"/> | <input type="checkbox"/> | <input type="checkbox"/> | <input type="checkbox"/> | <input type="checkbox"/> | <input type="checkbox"/> | <input type="checkbox"/> | <input type="checkbox"/> | <input type="checkbox"/> | <input type="checkbox"/> | <input type="checkbox"/> | <input type="checkbox"/> |  |
|             |                                                                                    |                                                                                                                                                                                                                                                             | Week 3 |      |             |                          | <input type="checkbox"/> | <input type="checkbox"/> | <input type="checkbox"/> | <input type="checkbox"/> | <input type="checkbox"/> | <input type="checkbox"/> | <input type="checkbox"/> | <input type="checkbox"/> | <input type="checkbox"/> | <input type="checkbox"/> | <input type="checkbox"/> |  |
|             |                                                                                    |                                                                                                                                                                                                                                                             | Week 4 |      |             |                          | <input type="checkbox"/> | <input type="checkbox"/> | <input type="checkbox"/> | <input type="checkbox"/> | <input type="checkbox"/> | <input type="checkbox"/> | <input type="checkbox"/> | <input type="checkbox"/> | <input type="checkbox"/> | <input type="checkbox"/> | <input type="checkbox"/> |  |
|             |                                                                                    |                                                                                                                                                                                                                                                             | Week 5 |      |             |                          | <input type="checkbox"/> | <input type="checkbox"/> | <input type="checkbox"/> | <input type="checkbox"/> | <input type="checkbox"/> | <input type="checkbox"/> | <input type="checkbox"/> | <input type="checkbox"/> | <input type="checkbox"/> | <input type="checkbox"/> | <input type="checkbox"/> |  |
|             |                                                                                    |                                                                                                                                                                                                                                                             | Week 6 |      |             |                          | <input type="checkbox"/> | <input type="checkbox"/> | <input type="checkbox"/> | <input type="checkbox"/> | <input type="checkbox"/> | <input type="checkbox"/> | <input type="checkbox"/> | <input type="checkbox"/> | <input type="checkbox"/> | <input type="checkbox"/> | <input type="checkbox"/> |  |

Patient Number

|  |  |  |
|--|--|--|
|  |  |  |
|--|--|--|

Date of issue

|   |   |   |   |   |   |
|---|---|---|---|---|---|
| D | D | M | M | Y | Y |
|---|---|---|---|---|---|

### WEEK FOUR- Home Exercise Training Diary

Please perform the marked exercises three times per week (including the supervised session). Mark when the exercises are completed - there are seven boxes, one for each day of the week.

Rest for 2 minutes between sets

|                                                                                    |                                                                                                                                                                                                                                                             |        |  |  |  |  |  |  |  |  |  |  |  |  |  |  |  |  |
|------------------------------------------------------------------------------------|-------------------------------------------------------------------------------------------------------------------------------------------------------------------------------------------------------------------------------------------------------------|--------|--|--|--|--|--|--|--|--|--|--|--|--|--|--|--|--|
|   | <ol style="list-style-type: none"> <li>1. Standing upright supported with a slight forward lean</li> <li>2. Tie a red band around the ankles</li> <li>3. Slowly take the painful leg backwards at the hip</li> <li>4. Try not to rotate the body</li> </ol> | Week 1 |  |  |  |  |  |  |  |  |  |  |  |  |  |  |  |  |
|                                                                                    |                                                                                                                                                                                                                                                             | Week 2 |  |  |  |  |  |  |  |  |  |  |  |  |  |  |  |  |
|                                                                                    |                                                                                                                                                                                                                                                             | Week 3 |  |  |  |  |  |  |  |  |  |  |  |  |  |  |  |  |
|                                                                                    |                                                                                                                                                                                                                                                             | Week 4 |  |  |  |  |  |  |  |  |  |  |  |  |  |  |  |  |
|                                                                                    |                                                                                                                                                                                                                                                             | Week 5 |  |  |  |  |  |  |  |  |  |  |  |  |  |  |  |  |
|                                                                                    |                                                                                                                                                                                                                                                             | Week 6 |  |  |  |  |  |  |  |  |  |  |  |  |  |  |  |  |
|                                                                                    |                                                                                                                                                                                                                                                             |        |  |  |  |  |  |  |  |  |  |  |  |  |  |  |  |  |
|  | <ol style="list-style-type: none"> <li>1. Standing upright supported with a slight forward lean</li> <li>2. Tie a red band around the ankles</li> <li>3. Slowly take the painful leg backwards at the hip</li> <li>4. Try not to rotate the body</li> </ol> | Week 1 |  |  |  |  |  |  |  |  |  |  |  |  |  |  |  |  |
|                                                                                    |                                                                                                                                                                                                                                                             | Week 2 |  |  |  |  |  |  |  |  |  |  |  |  |  |  |  |  |
|                                                                                    |                                                                                                                                                                                                                                                             | Week 3 |  |  |  |  |  |  |  |  |  |  |  |  |  |  |  |  |
|                                                                                    |                                                                                                                                                                                                                                                             | Week 4 |  |  |  |  |  |  |  |  |  |  |  |  |  |  |  |  |
|                                                                                    |                                                                                                                                                                                                                                                             | Week 5 |  |  |  |  |  |  |  |  |  |  |  |  |  |  |  |  |
|                                                                                    |                                                                                                                                                                                                                                                             | Week 6 |  |  |  |  |  |  |  |  |  |  |  |  |  |  |  |  |
|                                                                                    |                                                                                                                                                                                                                                                             |        |  |  |  |  |  |  |  |  |  |  |  |  |  |  |  |  |

Patient Number

|  |  |  |
|--|--|--|
|  |  |  |
|--|--|--|

Date of issue

|   |   |   |   |   |   |
|---|---|---|---|---|---|
| D | D | M | M | Y | Y |
|---|---|---|---|---|---|

### WEEK FOUR- Home Exercise Training Diary

Please perform the marked exercises three times per week (including the supervised session). Mark when the exercises are completed - there are seven boxes, one for each day of the week.

Rest for 2 minutes between sets

| To complete | Exercise                                                                           | Description                                                                                                                                                                                                                                                                                                                                                                             | Week   | Sets | Repetitions | To mark when completed   | % Completed              |                          |                          |                          |                          |                          |                          |  |
|-------------|------------------------------------------------------------------------------------|-----------------------------------------------------------------------------------------------------------------------------------------------------------------------------------------------------------------------------------------------------------------------------------------------------------------------------------------------------------------------------------------|--------|------|-------------|--------------------------|--------------------------|--------------------------|--------------------------|--------------------------|--------------------------|--------------------------|--------------------------|--|
|             | 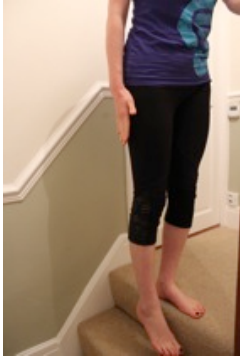  | <ol style="list-style-type: none"> <li>1. Standing on the lateral step on your painful leg (use support if necessary)</li> <li>2. With the non-painful leg let this drop towards the floor</li> <li>3. Tighten buttocks on painful leg side, lifting your non-painful leg back to neutral</li> </ol>                                                                                    | Week 1 |      |             | <input type="checkbox"/> | <input type="checkbox"/> | <input type="checkbox"/> | <input type="checkbox"/> | <input type="checkbox"/> | <input type="checkbox"/> |                          |                          |  |
|             |                                                                                    |                                                                                                                                                                                                                                                                                                                                                                                         | Week 2 |      |             | <input type="checkbox"/> | <input type="checkbox"/> | <input type="checkbox"/> | <input type="checkbox"/> | <input type="checkbox"/> | <input type="checkbox"/> | <input type="checkbox"/> |                          |  |
|             |                                                                                    |                                                                                                                                                                                                                                                                                                                                                                                         | Week 3 |      |             |                          | <input type="checkbox"/> | <input type="checkbox"/> | <input type="checkbox"/> | <input type="checkbox"/> | <input type="checkbox"/> | <input type="checkbox"/> | <input type="checkbox"/> |  |
|             |                                                                                    |                                                                                                                                                                                                                                                                                                                                                                                         | Week 4 |      |             |                          | <input type="checkbox"/> | <input type="checkbox"/> | <input type="checkbox"/> | <input type="checkbox"/> | <input type="checkbox"/> | <input type="checkbox"/> | <input type="checkbox"/> |  |
|             |                                                                                    |                                                                                                                                                                                                                                                                                                                                                                                         | Week 5 |      |             |                          | <input type="checkbox"/> | <input type="checkbox"/> | <input type="checkbox"/> | <input type="checkbox"/> | <input type="checkbox"/> | <input type="checkbox"/> | <input type="checkbox"/> |  |
|             |                                                                                    |                                                                                                                                                                                                                                                                                                                                                                                         | Week 6 |      |             |                          | <input type="checkbox"/> | <input type="checkbox"/> | <input type="checkbox"/> | <input type="checkbox"/> | <input type="checkbox"/> | <input type="checkbox"/> | <input type="checkbox"/> |  |
|             |  | <ol style="list-style-type: none"> <li>1. Standing on the lateral step on your painful leg (use support if necessary)</li> <li>2. Secure the yellow theraband to the floor with a weight e.g. heavy book</li> <li>3. With the non-painful leg let this drop towards the floor</li> <li>4. Tighten buttocks on painful leg side, lifting your non-painful leg back to neutral</li> </ol> | Week 1 |      |             | <input type="checkbox"/> | <input type="checkbox"/> | <input type="checkbox"/> | <input type="checkbox"/> | <input type="checkbox"/> | <input type="checkbox"/> |                          |                          |  |
|             |                                                                                    |                                                                                                                                                                                                                                                                                                                                                                                         | Week 2 |      |             | <input type="checkbox"/> | <input type="checkbox"/> | <input type="checkbox"/> | <input type="checkbox"/> | <input type="checkbox"/> | <input type="checkbox"/> | <input type="checkbox"/> |                          |  |
|             |                                                                                    |                                                                                                                                                                                                                                                                                                                                                                                         | Week 3 |      |             |                          | <input type="checkbox"/> | <input type="checkbox"/> | <input type="checkbox"/> | <input type="checkbox"/> | <input type="checkbox"/> | <input type="checkbox"/> | <input type="checkbox"/> |  |
|             |                                                                                    |                                                                                                                                                                                                                                                                                                                                                                                         | Week 4 |      |             |                          | <input type="checkbox"/> | <input type="checkbox"/> | <input type="checkbox"/> | <input type="checkbox"/> | <input type="checkbox"/> | <input type="checkbox"/> | <input type="checkbox"/> |  |
|             |                                                                                    |                                                                                                                                                                                                                                                                                                                                                                                         | Week 5 |      |             |                          | <input type="checkbox"/> | <input type="checkbox"/> | <input type="checkbox"/> | <input type="checkbox"/> | <input type="checkbox"/> | <input type="checkbox"/> | <input type="checkbox"/> |  |
|             |                                                                                    |                                                                                                                                                                                                                                                                                                                                                                                         | Week 6 |      |             |                          | <input type="checkbox"/> | <input type="checkbox"/> | <input type="checkbox"/> | <input type="checkbox"/> | <input type="checkbox"/> | <input type="checkbox"/> | <input type="checkbox"/> |  |

Patient Number

|  |  |  |
|--|--|--|
|  |  |  |
|--|--|--|

Date of issue

|   |   |   |   |   |   |
|---|---|---|---|---|---|
| D | D | M | M | Y | Y |
|---|---|---|---|---|---|

### WEEK FOUR- Home Exercise Training Diary

Please perform the marked exercises three times per week (including the supervised session). Mark when the exercises are completed - there are seven boxes, one for each day of the week.

Rest for 2 minutes between sets

|  |                                                                                    |                                                                                                                                                                                                                                                                                                                                                                                        |        |  |  |  |  |  |  |  |  |  |  |  |  |  |  |  |  |  |  |
|--|------------------------------------------------------------------------------------|----------------------------------------------------------------------------------------------------------------------------------------------------------------------------------------------------------------------------------------------------------------------------------------------------------------------------------------------------------------------------------------|--------|--|--|--|--|--|--|--|--|--|--|--|--|--|--|--|--|--|--|
|  |                                                                                    |                                                                                                                                                                                                                                                                                                                                                                                        |        |  |  |  |  |  |  |  |  |  |  |  |  |  |  |  |  |  |  |
|  |   | <ol style="list-style-type: none"> <li>1. Standing on the lateral step on your painful leg (use support if necessary)</li> <li>2. Secure the red theraband to the floor with a weight e.g. heavy book</li> <li>3. With the non-painful leg let this drop towards the floor</li> <li>4. Tighten buttocks on painful leg side, lifting your non-painful leg back to neutral</li> </ol>   | Week 1 |  |  |  |  |  |  |  |  |  |  |  |  |  |  |  |  |  |  |
|  |                                                                                    |                                                                                                                                                                                                                                                                                                                                                                                        | Week 2 |  |  |  |  |  |  |  |  |  |  |  |  |  |  |  |  |  |  |
|  |                                                                                    |                                                                                                                                                                                                                                                                                                                                                                                        | Week 3 |  |  |  |  |  |  |  |  |  |  |  |  |  |  |  |  |  |  |
|  |                                                                                    |                                                                                                                                                                                                                                                                                                                                                                                        | Week 4 |  |  |  |  |  |  |  |  |  |  |  |  |  |  |  |  |  |  |
|  |                                                                                    |                                                                                                                                                                                                                                                                                                                                                                                        | Week 5 |  |  |  |  |  |  |  |  |  |  |  |  |  |  |  |  |  |  |
|  |                                                                                    |                                                                                                                                                                                                                                                                                                                                                                                        | Week 6 |  |  |  |  |  |  |  |  |  |  |  |  |  |  |  |  |  |  |
|  |  | <ol style="list-style-type: none"> <li>1. Standing on the lateral step on your painful leg (use support if necessary)</li> <li>2. Secure the green theraband to the floor with a weight e.g. heavy book</li> <li>3. With the non-painful leg let this drop towards the floor</li> <li>4. Tighten buttocks on painful leg side, lifting your non-painful leg back to neutral</li> </ol> | Week 2 |  |  |  |  |  |  |  |  |  |  |  |  |  |  |  |  |  |  |
|  |                                                                                    |                                                                                                                                                                                                                                                                                                                                                                                        | Week 3 |  |  |  |  |  |  |  |  |  |  |  |  |  |  |  |  |  |  |
|  |                                                                                    |                                                                                                                                                                                                                                                                                                                                                                                        | Week 4 |  |  |  |  |  |  |  |  |  |  |  |  |  |  |  |  |  |  |
|  |                                                                                    |                                                                                                                                                                                                                                                                                                                                                                                        | Week 5 |  |  |  |  |  |  |  |  |  |  |  |  |  |  |  |  |  |  |
|  |                                                                                    |                                                                                                                                                                                                                                                                                                                                                                                        | Week 6 |  |  |  |  |  |  |  |  |  |  |  |  |  |  |  |  |  |  |

Patient Number

|  |  |  |
|--|--|--|
|  |  |  |
|--|--|--|

Date of issue

|   |   |   |   |   |   |
|---|---|---|---|---|---|
| D | D | M | M | Y | Y |
|---|---|---|---|---|---|

### WEEK FIVE – Home Exercise Training Diary

Please perform the marked exercises three times per week (including the supervised session). Mark when the exercises are completed – there are seven boxes, one for each day of the week.

Rest for 2 minutes between sets

| To complete | Exercise                                                                           | Description                                                                                                                                                                                                                                                                | Week   | Sets | Repetitions | To mark when completed   | % Completed              |                          |                          |                          |                          |                          |                          |                          |                          |                          |                          |                          |  |
|-------------|------------------------------------------------------------------------------------|----------------------------------------------------------------------------------------------------------------------------------------------------------------------------------------------------------------------------------------------------------------------------|--------|------|-------------|--------------------------|--------------------------|--------------------------|--------------------------|--------------------------|--------------------------|--------------------------|--------------------------|--------------------------|--------------------------|--------------------------|--------------------------|--------------------------|--|
|             |   | <ol style="list-style-type: none"> <li>1. Standing on your painful leg with your non-painful leg against a wall</li> <li>2. Bend your non-painful knee up and push into the wall</li> <li>3. Keep the leg and pelvis in neutral</li> <li>4. Push and then relax</li> </ol> | Week 1 |      |             | <input type="checkbox"/> | <input type="checkbox"/> | <input type="checkbox"/> | <input type="checkbox"/> | <input type="checkbox"/> | <input type="checkbox"/> | <input type="checkbox"/> | <input type="checkbox"/> | <input type="checkbox"/> | <input type="checkbox"/> |                          |                          |                          |  |
|             |                                                                                    |                                                                                                                                                                                                                                                                            | Week 2 |      |             | <input type="checkbox"/> | <input type="checkbox"/> | <input type="checkbox"/> | <input type="checkbox"/> | <input type="checkbox"/> | <input type="checkbox"/> | <input type="checkbox"/> | <input type="checkbox"/> | <input type="checkbox"/> | <input type="checkbox"/> | <input type="checkbox"/> | <input type="checkbox"/> |                          |  |
|             |                                                                                    |                                                                                                                                                                                                                                                                            | Week 3 |      |             |                          | <input type="checkbox"/> | <input type="checkbox"/> | <input type="checkbox"/> | <input type="checkbox"/> | <input type="checkbox"/> | <input type="checkbox"/> | <input type="checkbox"/> | <input type="checkbox"/> | <input type="checkbox"/> | <input type="checkbox"/> | <input type="checkbox"/> | <input type="checkbox"/> |  |
|             |                                                                                    |                                                                                                                                                                                                                                                                            | Week 4 |      |             |                          | <input type="checkbox"/> | <input type="checkbox"/> | <input type="checkbox"/> | <input type="checkbox"/> | <input type="checkbox"/> | <input type="checkbox"/> | <input type="checkbox"/> | <input type="checkbox"/> | <input type="checkbox"/> | <input type="checkbox"/> | <input type="checkbox"/> | <input type="checkbox"/> |  |
|             |                                                                                    |                                                                                                                                                                                                                                                                            | Week 5 |      |             |                          | <input type="checkbox"/> | <input type="checkbox"/> | <input type="checkbox"/> | <input type="checkbox"/> | <input type="checkbox"/> | <input type="checkbox"/> | <input type="checkbox"/> | <input type="checkbox"/> | <input type="checkbox"/> | <input type="checkbox"/> | <input type="checkbox"/> | <input type="checkbox"/> |  |
|             |                                                                                    |                                                                                                                                                                                                                                                                            | Week 6 |      |             |                          | <input type="checkbox"/> | <input type="checkbox"/> | <input type="checkbox"/> | <input type="checkbox"/> | <input type="checkbox"/> | <input type="checkbox"/> | <input type="checkbox"/> | <input type="checkbox"/> | <input type="checkbox"/> | <input type="checkbox"/> | <input type="checkbox"/> | <input type="checkbox"/> |  |
|             |  | <ol style="list-style-type: none"> <li>1. Standing on your painful leg with your non-painful leg against a wall</li> <li>2. Bend your non-painful knee up and push into the wall</li> <li>3. Keep the leg and pelvis in neutral</li> <li>4. 4. Hold 15 seconds</li> </ol>  | Week 1 |      |             | <input type="checkbox"/> | <input type="checkbox"/> | <input type="checkbox"/> | <input type="checkbox"/> | <input type="checkbox"/> | <input type="checkbox"/> | <input type="checkbox"/> | <input type="checkbox"/> | <input type="checkbox"/> | <input type="checkbox"/> | <input type="checkbox"/> |                          |                          |  |
|             |                                                                                    |                                                                                                                                                                                                                                                                            | Week 2 |      |             | <input type="checkbox"/> | <input type="checkbox"/> | <input type="checkbox"/> | <input type="checkbox"/> | <input type="checkbox"/> | <input type="checkbox"/> | <input type="checkbox"/> | <input type="checkbox"/> | <input type="checkbox"/> | <input type="checkbox"/> | <input type="checkbox"/> | <input type="checkbox"/> | <input type="checkbox"/> |  |
|             |                                                                                    |                                                                                                                                                                                                                                                                            | Week 3 |      |             |                          | <input type="checkbox"/> | <input type="checkbox"/> | <input type="checkbox"/> | <input type="checkbox"/> | <input type="checkbox"/> | <input type="checkbox"/> | <input type="checkbox"/> | <input type="checkbox"/> | <input type="checkbox"/> | <input type="checkbox"/> | <input type="checkbox"/> | <input type="checkbox"/> |  |
|             |                                                                                    |                                                                                                                                                                                                                                                                            | Week 4 |      |             |                          | <input type="checkbox"/> | <input type="checkbox"/> | <input type="checkbox"/> | <input type="checkbox"/> | <input type="checkbox"/> | <input type="checkbox"/> | <input type="checkbox"/> | <input type="checkbox"/> | <input type="checkbox"/> | <input type="checkbox"/> | <input type="checkbox"/> | <input type="checkbox"/> |  |
|             |                                                                                    |                                                                                                                                                                                                                                                                            | Week 5 |      |             |                          | <input type="checkbox"/> | <input type="checkbox"/> | <input type="checkbox"/> | <input type="checkbox"/> | <input type="checkbox"/> | <input type="checkbox"/> | <input type="checkbox"/> | <input type="checkbox"/> | <input type="checkbox"/> | <input type="checkbox"/> | <input type="checkbox"/> | <input type="checkbox"/> |  |
|             |                                                                                    |                                                                                                                                                                                                                                                                            | Week 6 |      |             |                          | <input type="checkbox"/> | <input type="checkbox"/> | <input type="checkbox"/> | <input type="checkbox"/> | <input type="checkbox"/> | <input type="checkbox"/> | <input type="checkbox"/> | <input type="checkbox"/> | <input type="checkbox"/> | <input type="checkbox"/> | <input type="checkbox"/> | <input type="checkbox"/> |  |

Patient Number

|  |  |  |
|--|--|--|
|  |  |  |
|--|--|--|

Date of issue

|   |   |   |   |   |   |
|---|---|---|---|---|---|
| D | D | M | M | Y | Y |
|---|---|---|---|---|---|

## WEEK FIVE – Home Exercise Training Diary

Please perform the marked exercises three times per week (including the supervised session). Mark when the exercises are completed – there are seven boxes, one for each day of the week.

Rest for 2 minutes between sets

|  |                                                                                   |                                                                                                                                                                                                                                                                        |        |  |  |  |  |  |  |  |  |  |  |  |  |  |  |  |  |  |
|--|-----------------------------------------------------------------------------------|------------------------------------------------------------------------------------------------------------------------------------------------------------------------------------------------------------------------------------------------------------------------|--------|--|--|--|--|--|--|--|--|--|--|--|--|--|--|--|--|--|
|  |  | <ol style="list-style-type: none"> <li>1. Standing on your painful leg with your non-painful leg against a wall</li> <li>2. Bend your non-painful knee up and push into the wall</li> <li>3. Keep the leg and pelvis in neutral</li> <li>4. Hold 30 seconds</li> </ol> | Week 1 |  |  |  |  |  |  |  |  |  |  |  |  |  |  |  |  |  |
|  |                                                                                   |                                                                                                                                                                                                                                                                        | Week 2 |  |  |  |  |  |  |  |  |  |  |  |  |  |  |  |  |  |
|  |                                                                                   |                                                                                                                                                                                                                                                                        | Week 3 |  |  |  |  |  |  |  |  |  |  |  |  |  |  |  |  |  |
|  |                                                                                   |                                                                                                                                                                                                                                                                        | Week 4 |  |  |  |  |  |  |  |  |  |  |  |  |  |  |  |  |  |
|  |                                                                                   |                                                                                                                                                                                                                                                                        | Week 5 |  |  |  |  |  |  |  |  |  |  |  |  |  |  |  |  |  |
|  |                                                                                   |                                                                                                                                                                                                                                                                        | Week 6 |  |  |  |  |  |  |  |  |  |  |  |  |  |  |  |  |  |
|  |                                                                                   |                                                                                                                                                                                                                                                                        |        |  |  |  |  |  |  |  |  |  |  |  |  |  |  |  |  |  |

Patient Number

|  |  |  |
|--|--|--|
|  |  |  |
|--|--|--|

Date of issue

|   |   |   |   |   |   |
|---|---|---|---|---|---|
| D | D | M | M | Y | Y |
|---|---|---|---|---|---|



### WEEK FIVE – Home Exercise Training Diary

Please perform the marked exercises three times per week (including the supervised session). Mark when the exercises are completed – there are seven boxes, one for each day of the week.

Rest for 2 minutes between sets

| To complete | Exercise                                                                           | Description                                                                                                                                                                                                                                                 | Week   | Sets | Repetitions | To mark when completed | % Completed |  |  |  |  |  |  |  |  |  |  |  |  |  |
|-------------|------------------------------------------------------------------------------------|-------------------------------------------------------------------------------------------------------------------------------------------------------------------------------------------------------------------------------------------------------------|--------|------|-------------|------------------------|-------------|--|--|--|--|--|--|--|--|--|--|--|--|--|
|             |   | <ol style="list-style-type: none"> <li>1. Standing upright supported with a slight forward lean</li> <li>2. Slowly take the painful leg backwards at the hip</li> <li>3. Try not rotate the body</li> </ol>                                                 | Week 1 |      |             |                        |             |  |  |  |  |  |  |  |  |  |  |  |  |  |
|             |                                                                                    |                                                                                                                                                                                                                                                             | Week 2 |      |             |                        |             |  |  |  |  |  |  |  |  |  |  |  |  |  |
|             |                                                                                    |                                                                                                                                                                                                                                                             | Week 3 |      |             |                        |             |  |  |  |  |  |  |  |  |  |  |  |  |  |
|             |                                                                                    |                                                                                                                                                                                                                                                             | Week 4 |      |             |                        |             |  |  |  |  |  |  |  |  |  |  |  |  |  |
|             |                                                                                    |                                                                                                                                                                                                                                                             | Week 5 |      |             |                        |             |  |  |  |  |  |  |  |  |  |  |  |  |  |
|             |                                                                                    |                                                                                                                                                                                                                                                             | Week 6 |      |             |                        |             |  |  |  |  |  |  |  |  |  |  |  |  |  |
|             |  | <ol style="list-style-type: none"> <li>1. Standing upright supported with a slight forward lean</li> <li>2. Tie a yellow band around the ankles</li> <li>3. Slowly take the painful leg backwards at the hip</li> <li>4. Try not rotate the body</li> </ol> | Week 1 |      |             |                        |             |  |  |  |  |  |  |  |  |  |  |  |  |  |
|             |                                                                                    |                                                                                                                                                                                                                                                             | Week 2 |      |             |                        |             |  |  |  |  |  |  |  |  |  |  |  |  |  |
|             |                                                                                    |                                                                                                                                                                                                                                                             | Week 3 |      |             |                        |             |  |  |  |  |  |  |  |  |  |  |  |  |  |
|             |                                                                                    |                                                                                                                                                                                                                                                             | Week 4 |      |             |                        |             |  |  |  |  |  |  |  |  |  |  |  |  |  |
|             |                                                                                    |                                                                                                                                                                                                                                                             | Week 5 |      |             |                        |             |  |  |  |  |  |  |  |  |  |  |  |  |  |
|             |                                                                                    |                                                                                                                                                                                                                                                             | Week 6 |      |             |                        |             |  |  |  |  |  |  |  |  |  |  |  |  |  |

Patient Number

|  |  |  |  |
|--|--|--|--|
|  |  |  |  |
|--|--|--|--|

Date of issue

|   |   |   |   |   |   |
|---|---|---|---|---|---|
| D | D | M | M | Y | Y |
|---|---|---|---|---|---|

### WEEK FIVE – Home Exercise Training Diary

Please perform the marked exercises three times per week (including the supervised session). Mark when the exercises are completed – there are seven boxes, one for each day of the week.

Rest for 2 minutes between sets

|  |                                                                                    |                                                                                                                                                                                                                                                          |        |  |  |  |  |  |  |  |  |  |  |  |  |  |  |  |  |  |
|--|------------------------------------------------------------------------------------|----------------------------------------------------------------------------------------------------------------------------------------------------------------------------------------------------------------------------------------------------------|--------|--|--|--|--|--|--|--|--|--|--|--|--|--|--|--|--|--|
|  |   | <ol style="list-style-type: none"> <li>1. Standing upright supported with a slight forward lean</li> <li>2. Tie a red band around the ankles</li> <li>3. Slowly take the painful leg backwards at the hip</li> <li>4. Try not rotate the body</li> </ol> | Week 1 |  |  |  |  |  |  |  |  |  |  |  |  |  |  |  |  |  |
|  |                                                                                    |                                                                                                                                                                                                                                                          | Week 2 |  |  |  |  |  |  |  |  |  |  |  |  |  |  |  |  |  |
|  |                                                                                    |                                                                                                                                                                                                                                                          | Week 3 |  |  |  |  |  |  |  |  |  |  |  |  |  |  |  |  |  |
|  |                                                                                    |                                                                                                                                                                                                                                                          | Week 4 |  |  |  |  |  |  |  |  |  |  |  |  |  |  |  |  |  |
|  |                                                                                    |                                                                                                                                                                                                                                                          | Week 5 |  |  |  |  |  |  |  |  |  |  |  |  |  |  |  |  |  |
|  |                                                                                    |                                                                                                                                                                                                                                                          | Week 6 |  |  |  |  |  |  |  |  |  |  |  |  |  |  |  |  |  |
|  |                                                                                    |                                                                                                                                                                                                                                                          |        |  |  |  |  |  |  |  |  |  |  |  |  |  |  |  |  |  |
|  |  | <ol style="list-style-type: none"> <li>1. Standing upright supported with a slight forward lean</li> <li>2. Tie a red band around the ankles</li> <li>3. Slowly take the painful leg backwards at the hip</li> <li>4. Try not rotate the body</li> </ol> | Week 1 |  |  |  |  |  |  |  |  |  |  |  |  |  |  |  |  |  |
|  |                                                                                    |                                                                                                                                                                                                                                                          | Week 2 |  |  |  |  |  |  |  |  |  |  |  |  |  |  |  |  |  |
|  |                                                                                    |                                                                                                                                                                                                                                                          | Week 3 |  |  |  |  |  |  |  |  |  |  |  |  |  |  |  |  |  |
|  |                                                                                    |                                                                                                                                                                                                                                                          | Week 4 |  |  |  |  |  |  |  |  |  |  |  |  |  |  |  |  |  |
|  |                                                                                    |                                                                                                                                                                                                                                                          | Week 5 |  |  |  |  |  |  |  |  |  |  |  |  |  |  |  |  |  |
|  |                                                                                    |                                                                                                                                                                                                                                                          | Week 6 |  |  |  |  |  |  |  |  |  |  |  |  |  |  |  |  |  |
|  |                                                                                    |                                                                                                                                                                                                                                                          |        |  |  |  |  |  |  |  |  |  |  |  |  |  |  |  |  |  |

Patient Number

|  |  |  |
|--|--|--|
|  |  |  |
|--|--|--|

Date of issue

|   |   |   |   |   |   |
|---|---|---|---|---|---|
| D | D | M | M | Y | Y |
|---|---|---|---|---|---|

### WEEK FIVE – Home Exercise Training Diary

Please perform the marked exercises three times per week (including the supervised session). Mark when the exercises are completed – there are seven boxes, one for each day of the week.

Rest for 2 minutes between sets

| To complete | Exercise                                                                            | Description                                                                                                                                                                                                                                                                                                      | Week   | Sets | Repetitions | To mark when completed | % Completed |  |  |  |  |  |  |  |  |  |  |
|-------------|-------------------------------------------------------------------------------------|------------------------------------------------------------------------------------------------------------------------------------------------------------------------------------------------------------------------------------------------------------------------------------------------------------------|--------|------|-------------|------------------------|-------------|--|--|--|--|--|--|--|--|--|--|
|             | 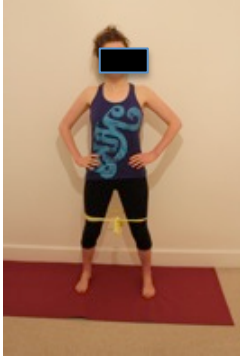   | <ol style="list-style-type: none"> <li>1. Standing with feet shoulder width apart</li> <li>2. Tie yellow band around ankles</li> <li>3. Maintain a 30 degree hip and knee position</li> <li>4. Side step one direction then the other</li> <li>5. Keep tension on the band and toes pointing forwards</li> </ol> | Week 1 |      |             |                        |             |  |  |  |  |  |  |  |  |  |  |
|             |                                                                                     |                                                                                                                                                                                                                                                                                                                  | Week 2 |      |             |                        |             |  |  |  |  |  |  |  |  |  |  |
|             |                                                                                     |                                                                                                                                                                                                                                                                                                                  | Week 3 |      |             |                        |             |  |  |  |  |  |  |  |  |  |  |
|             |                                                                                     |                                                                                                                                                                                                                                                                                                                  | Week 4 |      |             |                        |             |  |  |  |  |  |  |  |  |  |  |
|             |                                                                                     |                                                                                                                                                                                                                                                                                                                  | Week 5 |      |             |                        |             |  |  |  |  |  |  |  |  |  |  |
|             |                                                                                     |                                                                                                                                                                                                                                                                                                                  | Week 6 |      |             |                        |             |  |  |  |  |  |  |  |  |  |  |
|             |  | <ol style="list-style-type: none"> <li>1. Standing with feet shoulder width apart</li> <li>2. Tie red band around ankles</li> <li>3. Maintain a 30 degree hip and knee position</li> <li>4. Side step one direction then the other</li> <li>5. Keep tension on the band and toes pointing forwards</li> </ol>    | Week 1 |      |             |                        |             |  |  |  |  |  |  |  |  |  |  |
|             |                                                                                     |                                                                                                                                                                                                                                                                                                                  | Week 2 |      |             |                        |             |  |  |  |  |  |  |  |  |  |  |
|             |                                                                                     |                                                                                                                                                                                                                                                                                                                  | Week 3 |      |             |                        |             |  |  |  |  |  |  |  |  |  |  |
|             |                                                                                     |                                                                                                                                                                                                                                                                                                                  | Week 4 |      |             |                        |             |  |  |  |  |  |  |  |  |  |  |
|             |                                                                                     |                                                                                                                                                                                                                                                                                                                  | Week 5 |      |             |                        |             |  |  |  |  |  |  |  |  |  |  |
|             |                                                                                     |                                                                                                                                                                                                                                                                                                                  | Week 6 |      |             |                        |             |  |  |  |  |  |  |  |  |  |  |

Patient Number

|  |  |  |
|--|--|--|
|  |  |  |
|--|--|--|

Date of issue

|   |   |   |   |   |   |
|---|---|---|---|---|---|
| D | D | M | M | Y | Y |
|---|---|---|---|---|---|

## WEEK FIVE – Home Exercise Training Diary

Please perform the marked exercises three times per week (including the supervised session). Mark when the exercises are completed – there are seven boxes, one for each day of the week.

Rest for 2 minutes between sets

|  |                                                                                   |                                                                                                                                                                                                                                                                                                                 |        |  |  |  |  |  |  |  |  |  |  |  |  |  |  |  |  |
|--|-----------------------------------------------------------------------------------|-----------------------------------------------------------------------------------------------------------------------------------------------------------------------------------------------------------------------------------------------------------------------------------------------------------------|--------|--|--|--|--|--|--|--|--|--|--|--|--|--|--|--|--|
|  |  | <ol style="list-style-type: none"> <li>1. Standing with feet shoulder width apart</li> <li>2. Tie green band around ankles</li> <li>3. Maintain a 30 degree hip and knee position</li> <li>4. Side step one direction then the other</li> <li>5. Keep tension on the band and toes pointing forwards</li> </ol> | Week 1 |  |  |  |  |  |  |  |  |  |  |  |  |  |  |  |  |
|  |                                                                                   |                                                                                                                                                                                                                                                                                                                 | Week 2 |  |  |  |  |  |  |  |  |  |  |  |  |  |  |  |  |
|  |                                                                                   |                                                                                                                                                                                                                                                                                                                 | Week 3 |  |  |  |  |  |  |  |  |  |  |  |  |  |  |  |  |
|  |                                                                                   |                                                                                                                                                                                                                                                                                                                 | Week 4 |  |  |  |  |  |  |  |  |  |  |  |  |  |  |  |  |
|  |                                                                                   |                                                                                                                                                                                                                                                                                                                 | Week 5 |  |  |  |  |  |  |  |  |  |  |  |  |  |  |  |  |
|  |                                                                                   |                                                                                                                                                                                                                                                                                                                 | Week 6 |  |  |  |  |  |  |  |  |  |  |  |  |  |  |  |  |
|  |                                                                                   |                                                                                                                                                                                                                                                                                                                 |        |  |  |  |  |  |  |  |  |  |  |  |  |  |  |  |  |

Patient Number

|  |  |  |
|--|--|--|
|  |  |  |
|--|--|--|

Date of issue

|   |   |   |   |   |   |
|---|---|---|---|---|---|
| D | D | M | M | Y | Y |
|---|---|---|---|---|---|

## WEEK SIX – Home Exercise Training Diary

Please perform the marked exercises three times per week (including the supervised session). Mark when the exercises are completed – there are seven boxes, one for each day of the week.

Rest for 2 minutes between sets

| To complete | Exercise                                                                           | Description                                                                                                                                                                                                                                                        | Week   | Sets | Repetitions | To mark when completed   | % Completed              |                          |                          |                          |                          |                          |                          |                          |                          |                          |                          |                          |  |
|-------------|------------------------------------------------------------------------------------|--------------------------------------------------------------------------------------------------------------------------------------------------------------------------------------------------------------------------------------------------------------------|--------|------|-------------|--------------------------|--------------------------|--------------------------|--------------------------|--------------------------|--------------------------|--------------------------|--------------------------|--------------------------|--------------------------|--------------------------|--------------------------|--------------------------|--|
|             |   | <ol style="list-style-type: none"> <li>1. Standing with feet shoulder width apart</li> <li>2. Tie yellow band around ankles</li> <li>3. Maintain a 30 degree hip and knee position</li> <li>4. Take diagonal, forward steps Forwards and then backwards</li> </ol> | Week 1 |      |             | <input type="checkbox"/> | <input type="checkbox"/> | <input type="checkbox"/> | <input type="checkbox"/> | <input type="checkbox"/> | <input type="checkbox"/> | <input type="checkbox"/> | <input type="checkbox"/> | <input type="checkbox"/> | <input type="checkbox"/> |                          |                          |                          |  |
|             |                                                                                    |                                                                                                                                                                                                                                                                    | Week 2 |      |             | <input type="checkbox"/> | <input type="checkbox"/> | <input type="checkbox"/> | <input type="checkbox"/> | <input type="checkbox"/> | <input type="checkbox"/> | <input type="checkbox"/> | <input type="checkbox"/> | <input type="checkbox"/> | <input type="checkbox"/> | <input type="checkbox"/> | <input type="checkbox"/> |                          |  |
|             |                                                                                    |                                                                                                                                                                                                                                                                    | Week 3 |      |             |                          | <input type="checkbox"/> | <input type="checkbox"/> | <input type="checkbox"/> | <input type="checkbox"/> | <input type="checkbox"/> | <input type="checkbox"/> | <input type="checkbox"/> | <input type="checkbox"/> | <input type="checkbox"/> | <input type="checkbox"/> | <input type="checkbox"/> | <input type="checkbox"/> |  |
|             |                                                                                    |                                                                                                                                                                                                                                                                    | Week 4 |      |             |                          | <input type="checkbox"/> | <input type="checkbox"/> | <input type="checkbox"/> | <input type="checkbox"/> | <input type="checkbox"/> | <input type="checkbox"/> | <input type="checkbox"/> | <input type="checkbox"/> | <input type="checkbox"/> | <input type="checkbox"/> | <input type="checkbox"/> | <input type="checkbox"/> |  |
|             |                                                                                    |                                                                                                                                                                                                                                                                    | Week 5 |      |             |                          | <input type="checkbox"/> | <input type="checkbox"/> | <input type="checkbox"/> | <input type="checkbox"/> | <input type="checkbox"/> | <input type="checkbox"/> | <input type="checkbox"/> | <input type="checkbox"/> | <input type="checkbox"/> | <input type="checkbox"/> | <input type="checkbox"/> | <input type="checkbox"/> |  |
|             |                                                                                    |                                                                                                                                                                                                                                                                    | Week 6 |      |             |                          | <input type="checkbox"/> | <input type="checkbox"/> | <input type="checkbox"/> | <input type="checkbox"/> | <input type="checkbox"/> | <input type="checkbox"/> | <input type="checkbox"/> | <input type="checkbox"/> | <input type="checkbox"/> | <input type="checkbox"/> | <input type="checkbox"/> | <input type="checkbox"/> |  |
|             |  | <ol style="list-style-type: none"> <li>1. Standing with feet shoulder width apart</li> <li>2. Tie red band around ankles</li> <li>3. Maintain a 30 degree hip and knee position</li> <li>4. Take diagonal, forward steps Forwards and then backwards</li> </ol>    | Week 1 |      |             | <input type="checkbox"/> | <input type="checkbox"/> | <input type="checkbox"/> | <input type="checkbox"/> | <input type="checkbox"/> | <input type="checkbox"/> | <input type="checkbox"/> | <input type="checkbox"/> | <input type="checkbox"/> | <input type="checkbox"/> | <input type="checkbox"/> |                          |                          |  |
|             |                                                                                    |                                                                                                                                                                                                                                                                    | Week 2 |      |             | <input type="checkbox"/> | <input type="checkbox"/> | <input type="checkbox"/> | <input type="checkbox"/> | <input type="checkbox"/> | <input type="checkbox"/> | <input type="checkbox"/> | <input type="checkbox"/> | <input type="checkbox"/> | <input type="checkbox"/> | <input type="checkbox"/> | <input type="checkbox"/> | <input type="checkbox"/> |  |
|             |                                                                                    |                                                                                                                                                                                                                                                                    | Week 3 |      |             |                          | <input type="checkbox"/> | <input type="checkbox"/> | <input type="checkbox"/> | <input type="checkbox"/> | <input type="checkbox"/> | <input type="checkbox"/> | <input type="checkbox"/> | <input type="checkbox"/> | <input type="checkbox"/> | <input type="checkbox"/> | <input type="checkbox"/> | <input type="checkbox"/> |  |
|             |                                                                                    |                                                                                                                                                                                                                                                                    | Week 4 |      |             |                          | <input type="checkbox"/> | <input type="checkbox"/> | <input type="checkbox"/> | <input type="checkbox"/> | <input type="checkbox"/> | <input type="checkbox"/> | <input type="checkbox"/> | <input type="checkbox"/> | <input type="checkbox"/> | <input type="checkbox"/> | <input type="checkbox"/> | <input type="checkbox"/> |  |
|             |                                                                                    |                                                                                                                                                                                                                                                                    | Week 5 |      |             |                          | <input type="checkbox"/> | <input type="checkbox"/> | <input type="checkbox"/> | <input type="checkbox"/> | <input type="checkbox"/> | <input type="checkbox"/> | <input type="checkbox"/> | <input type="checkbox"/> | <input type="checkbox"/> | <input type="checkbox"/> | <input type="checkbox"/> | <input type="checkbox"/> |  |

Patient Number

|  |  |  |
|--|--|--|
|  |  |  |
|--|--|--|

Date of issue

|   |   |   |   |   |   |
|---|---|---|---|---|---|
| D | D | M | M | Y | Y |
|---|---|---|---|---|---|

## WEEK SIX – Home Exercise Training Diary

Please perform the marked exercises three times per week (including the supervised session). Mark when the exercises are completed – there are seven boxes, one for each day of the week.

Rest for 2 minutes between sets

|  |                                                                                   |                                                                                                                                                                                                                                                                   |        |  |  |  |  |  |  |  |  |  |  |  |  |  |  |  |  |  |
|--|-----------------------------------------------------------------------------------|-------------------------------------------------------------------------------------------------------------------------------------------------------------------------------------------------------------------------------------------------------------------|--------|--|--|--|--|--|--|--|--|--|--|--|--|--|--|--|--|--|
|  |                                                                                   |                                                                                                                                                                                                                                                                   | Week 6 |  |  |  |  |  |  |  |  |  |  |  |  |  |  |  |  |  |
|  |  | <ol style="list-style-type: none"> <li>1. Standing with feet shoulder width apart</li> <li>2. Tie green band around ankles</li> <li>3. Maintain a 30 degree hip and knee position</li> <li>4. Take diagonal, forward steps Forwards and then backwards</li> </ol> | Week 1 |  |  |  |  |  |  |  |  |  |  |  |  |  |  |  |  |  |
|  |                                                                                   |                                                                                                                                                                                                                                                                   | Week 2 |  |  |  |  |  |  |  |  |  |  |  |  |  |  |  |  |  |
|  |                                                                                   |                                                                                                                                                                                                                                                                   | Week 3 |  |  |  |  |  |  |  |  |  |  |  |  |  |  |  |  |  |
|  |                                                                                   |                                                                                                                                                                                                                                                                   | Week 4 |  |  |  |  |  |  |  |  |  |  |  |  |  |  |  |  |  |
|  |                                                                                   |                                                                                                                                                                                                                                                                   | Week 5 |  |  |  |  |  |  |  |  |  |  |  |  |  |  |  |  |  |
|  |                                                                                   |                                                                                                                                                                                                                                                                   | Week 6 |  |  |  |  |  |  |  |  |  |  |  |  |  |  |  |  |  |

Patient Number

|  |  |  |
|--|--|--|
|  |  |  |
|--|--|--|

Date of issue

|   |   |   |   |   |   |
|---|---|---|---|---|---|
| D | D | M | M | Y | Y |
|---|---|---|---|---|---|

## WEEK SIX – Home Exercise Training Diary

Please perform the marked exercises three times per week (including the supervised session). Mark when the exercises are completed – there are seven boxes, one for each day of the week.

Rest for 2 minutes between sets

| To complete | Exercise                                                                           | Description                                                                                                                                                                                                                                                                                     | Week   | Sets | Repetitions | To mark when completed   | % Completed              |                          |                          |                          |                          |                          |                          |  |
|-------------|------------------------------------------------------------------------------------|-------------------------------------------------------------------------------------------------------------------------------------------------------------------------------------------------------------------------------------------------------------------------------------------------|--------|------|-------------|--------------------------|--------------------------|--------------------------|--------------------------|--------------------------|--------------------------|--------------------------|--------------------------|--|
|             |   | <ol style="list-style-type: none"> <li>In the quadrupedal position with the upper body supported by the forearms</li> <li>Place yellow theraband around the thigh near the knee joint</li> <li>Lift the leg up towards the ceiling with the knee bent to 90 degrees pulling the band</li> </ol> | Week 1 |      |             | <input type="checkbox"/> | <input type="checkbox"/> | <input type="checkbox"/> | <input type="checkbox"/> | <input type="checkbox"/> | <input type="checkbox"/> |                          |                          |  |
|             |                                                                                    |                                                                                                                                                                                                                                                                                                 | Week 2 |      |             | <input type="checkbox"/> | <input type="checkbox"/> | <input type="checkbox"/> | <input type="checkbox"/> | <input type="checkbox"/> | <input type="checkbox"/> | <input type="checkbox"/> |                          |  |
|             |                                                                                    |                                                                                                                                                                                                                                                                                                 | Week 3 |      |             |                          | <input type="checkbox"/> | <input type="checkbox"/> | <input type="checkbox"/> | <input type="checkbox"/> | <input type="checkbox"/> | <input type="checkbox"/> | <input type="checkbox"/> |  |
|             |                                                                                    |                                                                                                                                                                                                                                                                                                 | Week 4 |      |             |                          | <input type="checkbox"/> | <input type="checkbox"/> | <input type="checkbox"/> | <input type="checkbox"/> | <input type="checkbox"/> | <input type="checkbox"/> | <input type="checkbox"/> |  |
|             |                                                                                    |                                                                                                                                                                                                                                                                                                 | Week 5 |      |             |                          | <input type="checkbox"/> | <input type="checkbox"/> | <input type="checkbox"/> | <input type="checkbox"/> | <input type="checkbox"/> | <input type="checkbox"/> | <input type="checkbox"/> |  |
|             |                                                                                    |                                                                                                                                                                                                                                                                                                 | Week 6 |      |             |                          | <input type="checkbox"/> | <input type="checkbox"/> | <input type="checkbox"/> | <input type="checkbox"/> | <input type="checkbox"/> | <input type="checkbox"/> | <input type="checkbox"/> |  |
|             |  | <ol style="list-style-type: none"> <li>In the quadrupedal position with the upper body supported by the forearms</li> <li>Place red theraband around the thigh near the knee joint</li> <li>Lift the leg up towards the ceiling with the knee bent to 90 degrees pulling the band</li> </ol>    | Week 1 |      |             | <input type="checkbox"/> | <input type="checkbox"/> | <input type="checkbox"/> | <input type="checkbox"/> | <input type="checkbox"/> | <input type="checkbox"/> |                          |                          |  |
|             |                                                                                    |                                                                                                                                                                                                                                                                                                 | Week 2 |      |             | <input type="checkbox"/> | <input type="checkbox"/> | <input type="checkbox"/> | <input type="checkbox"/> | <input type="checkbox"/> | <input type="checkbox"/> | <input type="checkbox"/> |                          |  |
|             |                                                                                    |                                                                                                                                                                                                                                                                                                 | Week 3 |      |             |                          | <input type="checkbox"/> | <input type="checkbox"/> | <input type="checkbox"/> | <input type="checkbox"/> | <input type="checkbox"/> | <input type="checkbox"/> | <input type="checkbox"/> |  |
|             |                                                                                    |                                                                                                                                                                                                                                                                                                 | Week 4 |      |             |                          | <input type="checkbox"/> | <input type="checkbox"/> | <input type="checkbox"/> | <input type="checkbox"/> | <input type="checkbox"/> | <input type="checkbox"/> | <input type="checkbox"/> |  |
|             |                                                                                    |                                                                                                                                                                                                                                                                                                 | Week 5 |      |             |                          | <input type="checkbox"/> | <input type="checkbox"/> | <input type="checkbox"/> | <input type="checkbox"/> | <input type="checkbox"/> | <input type="checkbox"/> | <input type="checkbox"/> |  |

Patient Number

|  |  |  |
|--|--|--|
|  |  |  |
|--|--|--|

Date of issue

|   |   |   |   |   |   |
|---|---|---|---|---|---|
| D | D | M | M | Y | Y |
|---|---|---|---|---|---|

## WEEK SIX – Home Exercise Training Diary

Please perform the marked exercises three times per week (including the supervised session). Mark when the exercises are completed – there are seven boxes, one for each day of the week.

Rest for 2 minutes between sets

|  |                                                                                   |                                                                                                                                                                                                                                                                                                        |        |  |  |  |  |  |  |  |  |  |  |  |  |  |  |  |  |
|--|-----------------------------------------------------------------------------------|--------------------------------------------------------------------------------------------------------------------------------------------------------------------------------------------------------------------------------------------------------------------------------------------------------|--------|--|--|--|--|--|--|--|--|--|--|--|--|--|--|--|--|
|  |                                                                                   |                                                                                                                                                                                                                                                                                                        | Week 6 |  |  |  |  |  |  |  |  |  |  |  |  |  |  |  |  |
|  |                                                                                   |                                                                                                                                                                                                                                                                                                        |        |  |  |  |  |  |  |  |  |  |  |  |  |  |  |  |  |
|  |  | <ol style="list-style-type: none"> <li>1. In the quadrupled position with the upper body supported by the forearms</li> <li>2. Place green theraband around the thigh near the knee joint</li> <li>3. Lift the leg up towards the ceiling with the knee bent to 90 degrees pulling the band</li> </ol> | Week 1 |  |  |  |  |  |  |  |  |  |  |  |  |  |  |  |  |
|  |                                                                                   |                                                                                                                                                                                                                                                                                                        | Week 2 |  |  |  |  |  |  |  |  |  |  |  |  |  |  |  |  |
|  |                                                                                   |                                                                                                                                                                                                                                                                                                        | Week 3 |  |  |  |  |  |  |  |  |  |  |  |  |  |  |  |  |
|  |                                                                                   |                                                                                                                                                                                                                                                                                                        | Week 4 |  |  |  |  |  |  |  |  |  |  |  |  |  |  |  |  |
|  |                                                                                   |                                                                                                                                                                                                                                                                                                        | Week 5 |  |  |  |  |  |  |  |  |  |  |  |  |  |  |  |  |
|  |                                                                                   |                                                                                                                                                                                                                                                                                                        | Week 6 |  |  |  |  |  |  |  |  |  |  |  |  |  |  |  |  |

Patient Number

|  |  |  |
|--|--|--|
|  |  |  |
|--|--|--|

Date of issue

|   |   |   |   |   |   |
|---|---|---|---|---|---|
| D | D | M | M | Y | Y |
|---|---|---|---|---|---|



## WEEK SIX – Home Exercise Training Diary

Please perform the marked exercises three times per week (including the supervised session). Mark when the exercises are completed – there are seven boxes, one for each day of the week.

Rest for 2 minutes between sets

| To complete | Exercise                                                                           | Description                                                                                                                                                                                                                                                                                                      | Week   | Sets | Repetitions | To mark when completed   | % Completed              |                          |                          |                          |                          |                          |                          |                          |                          |                          |                          |                          |  |
|-------------|------------------------------------------------------------------------------------|------------------------------------------------------------------------------------------------------------------------------------------------------------------------------------------------------------------------------------------------------------------------------------------------------------------|--------|------|-------------|--------------------------|--------------------------|--------------------------|--------------------------|--------------------------|--------------------------|--------------------------|--------------------------|--------------------------|--------------------------|--------------------------|--------------------------|--------------------------|--|
|             | 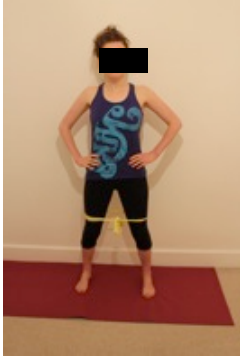  | <ol style="list-style-type: none"> <li>1. Standing with feet shoulder width apart</li> <li>2. Tie yellow band around ankles</li> <li>3. Maintain a 30 degree hip and knee position</li> <li>4. Side step one direction then the other</li> <li>5. Keep tension on the band and toes pointing forwards</li> </ol> | Week 1 |      |             | <input type="checkbox"/> | <input type="checkbox"/> | <input type="checkbox"/> | <input type="checkbox"/> | <input type="checkbox"/> | <input type="checkbox"/> | <input type="checkbox"/> | <input type="checkbox"/> | <input type="checkbox"/> | <input type="checkbox"/> |                          |                          |                          |  |
|             |                                                                                    |                                                                                                                                                                                                                                                                                                                  | Week 2 |      |             | <input type="checkbox"/> | <input type="checkbox"/> | <input type="checkbox"/> | <input type="checkbox"/> | <input type="checkbox"/> | <input type="checkbox"/> | <input type="checkbox"/> | <input type="checkbox"/> | <input type="checkbox"/> | <input type="checkbox"/> | <input type="checkbox"/> | <input type="checkbox"/> |                          |  |
|             |                                                                                    |                                                                                                                                                                                                                                                                                                                  | Week 3 |      |             |                          | <input type="checkbox"/> | <input type="checkbox"/> | <input type="checkbox"/> | <input type="checkbox"/> | <input type="checkbox"/> | <input type="checkbox"/> | <input type="checkbox"/> | <input type="checkbox"/> | <input type="checkbox"/> | <input type="checkbox"/> | <input type="checkbox"/> | <input type="checkbox"/> |  |
|             |                                                                                    |                                                                                                                                                                                                                                                                                                                  | Week 4 |      |             |                          | <input type="checkbox"/> | <input type="checkbox"/> | <input type="checkbox"/> | <input type="checkbox"/> | <input type="checkbox"/> | <input type="checkbox"/> | <input type="checkbox"/> | <input type="checkbox"/> | <input type="checkbox"/> | <input type="checkbox"/> | <input type="checkbox"/> | <input type="checkbox"/> |  |
|             |                                                                                    |                                                                                                                                                                                                                                                                                                                  | Week 5 |      |             |                          | <input type="checkbox"/> | <input type="checkbox"/> | <input type="checkbox"/> | <input type="checkbox"/> | <input type="checkbox"/> | <input type="checkbox"/> | <input type="checkbox"/> | <input type="checkbox"/> | <input type="checkbox"/> | <input type="checkbox"/> | <input type="checkbox"/> | <input type="checkbox"/> |  |
|             |                                                                                    |                                                                                                                                                                                                                                                                                                                  | Week 6 |      |             |                          | <input type="checkbox"/> | <input type="checkbox"/> | <input type="checkbox"/> | <input type="checkbox"/> | <input type="checkbox"/> | <input type="checkbox"/> | <input type="checkbox"/> | <input type="checkbox"/> | <input type="checkbox"/> | <input type="checkbox"/> | <input type="checkbox"/> | <input type="checkbox"/> |  |
|             |  | <ol style="list-style-type: none"> <li>1. Standing with feet shoulder width apart</li> <li>2. Tie red band around ankles</li> <li>3. Maintain a 30 degree hip and knee position</li> <li>4. Side step one direction then the other</li> <li>5. Keep tension on the band and toes pointing forwards</li> </ol>    | Week 1 |      |             | <input type="checkbox"/> | <input type="checkbox"/> | <input type="checkbox"/> | <input type="checkbox"/> | <input type="checkbox"/> | <input type="checkbox"/> | <input type="checkbox"/> | <input type="checkbox"/> | <input type="checkbox"/> | <input type="checkbox"/> | <input type="checkbox"/> |                          |                          |  |
|             |                                                                                    |                                                                                                                                                                                                                                                                                                                  | Week 2 |      |             | <input type="checkbox"/> | <input type="checkbox"/> | <input type="checkbox"/> | <input type="checkbox"/> | <input type="checkbox"/> | <input type="checkbox"/> | <input type="checkbox"/> | <input type="checkbox"/> | <input type="checkbox"/> | <input type="checkbox"/> | <input type="checkbox"/> | <input type="checkbox"/> | <input type="checkbox"/> |  |
|             |                                                                                    |                                                                                                                                                                                                                                                                                                                  | Week 3 |      |             |                          | <input type="checkbox"/> | <input type="checkbox"/> | <input type="checkbox"/> | <input type="checkbox"/> | <input type="checkbox"/> | <input type="checkbox"/> | <input type="checkbox"/> | <input type="checkbox"/> | <input type="checkbox"/> | <input type="checkbox"/> | <input type="checkbox"/> | <input type="checkbox"/> |  |
|             |                                                                                    |                                                                                                                                                                                                                                                                                                                  | Week 4 |      |             |                          | <input type="checkbox"/> | <input type="checkbox"/> | <input type="checkbox"/> | <input type="checkbox"/> | <input type="checkbox"/> | <input type="checkbox"/> | <input type="checkbox"/> | <input type="checkbox"/> | <input type="checkbox"/> | <input type="checkbox"/> | <input type="checkbox"/> | <input type="checkbox"/> |  |
|             |                                                                                    |                                                                                                                                                                                                                                                                                                                  | Week 5 |      |             |                          | <input type="checkbox"/> | <input type="checkbox"/> | <input type="checkbox"/> | <input type="checkbox"/> | <input type="checkbox"/> | <input type="checkbox"/> | <input type="checkbox"/> | <input type="checkbox"/> | <input type="checkbox"/> | <input type="checkbox"/> | <input type="checkbox"/> | <input type="checkbox"/> |  |

Patient Number

|  |  |  |
|--|--|--|
|  |  |  |
|--|--|--|

Date of issue

|   |   |   |   |   |   |
|---|---|---|---|---|---|
| D | D | M | M | Y | Y |
|---|---|---|---|---|---|

## WEEK SIX – Home Exercise Training Diary

Please perform the marked exercises three times per week (including the supervised session). Mark when the exercises are completed – there are seven boxes, one for each day of the week.

Rest for 2 minutes between sets

|  |                                                                                   |                                                                                                                                                                                                                                                                                                                 |        |  |  |  |  |  |  |  |  |  |  |  |  |  |  |  |  |  |
|--|-----------------------------------------------------------------------------------|-----------------------------------------------------------------------------------------------------------------------------------------------------------------------------------------------------------------------------------------------------------------------------------------------------------------|--------|--|--|--|--|--|--|--|--|--|--|--|--|--|--|--|--|--|
|  |                                                                                   |                                                                                                                                                                                                                                                                                                                 | Week 6 |  |  |  |  |  |  |  |  |  |  |  |  |  |  |  |  |  |
|  |  | <ol style="list-style-type: none"> <li>1. Standing with feet shoulder width apart</li> <li>2. Tie green band around ankles</li> <li>3. Maintain a 30 degree hip and knee position</li> <li>4. Side step one direction then the other</li> <li>5. Keep tension on the band and toes pointing forwards</li> </ol> | Week 1 |  |  |  |  |  |  |  |  |  |  |  |  |  |  |  |  |  |
|  |                                                                                   |                                                                                                                                                                                                                                                                                                                 | Week 2 |  |  |  |  |  |  |  |  |  |  |  |  |  |  |  |  |  |
|  |                                                                                   |                                                                                                                                                                                                                                                                                                                 | Week 3 |  |  |  |  |  |  |  |  |  |  |  |  |  |  |  |  |  |
|  |                                                                                   |                                                                                                                                                                                                                                                                                                                 | Week 4 |  |  |  |  |  |  |  |  |  |  |  |  |  |  |  |  |  |
|  |                                                                                   |                                                                                                                                                                                                                                                                                                                 | Week 5 |  |  |  |  |  |  |  |  |  |  |  |  |  |  |  |  |  |
|  |                                                                                   |                                                                                                                                                                                                                                                                                                                 | Week 6 |  |  |  |  |  |  |  |  |  |  |  |  |  |  |  |  |  |

Patient Number

|  |  |  |
|--|--|--|
|  |  |  |
|--|--|--|

Date of issue

|   |   |   |   |   |   |
|---|---|---|---|---|---|
| D | D | M | M | Y | Y |
|---|---|---|---|---|---|

## WEEK SIX – Home Exercise Training Diary

Please perform the marked exercises three times per week (including the supervised session). Mark when the exercises are completed – there are seven boxes, one for each day of the week.

Rest for 2 minutes between sets

| To complete | Exercise                                                                           | Description                                                                                                                                                                                                                                                                    | Week   | Sets | Repetitions | To mark when completed   | % Completed              |                          |                          |                          |                          |                          |                          |                          |                          |                          |                          |                          |  |
|-------------|------------------------------------------------------------------------------------|--------------------------------------------------------------------------------------------------------------------------------------------------------------------------------------------------------------------------------------------------------------------------------|--------|------|-------------|--------------------------|--------------------------|--------------------------|--------------------------|--------------------------|--------------------------|--------------------------|--------------------------|--------------------------|--------------------------|--------------------------|--------------------------|--------------------------|--|
|             |   | <ol style="list-style-type: none"> <li>1. Standing with feet shoulder width apart</li> <li>2. Tie yellow band around ankles</li> <li>3. Maintain a 30 degree hip and knee position</li> <li>4. Take diagonal, forward steps</li> <li>5. Forwards and then backwards</li> </ol> | Week 1 |      |             | <input type="checkbox"/> | <input type="checkbox"/> | <input type="checkbox"/> | <input type="checkbox"/> | <input type="checkbox"/> | <input type="checkbox"/> | <input type="checkbox"/> | <input type="checkbox"/> | <input type="checkbox"/> | <input type="checkbox"/> |                          |                          |                          |  |
|             |                                                                                    |                                                                                                                                                                                                                                                                                | Week 2 |      |             | <input type="checkbox"/> | <input type="checkbox"/> | <input type="checkbox"/> | <input type="checkbox"/> | <input type="checkbox"/> | <input type="checkbox"/> | <input type="checkbox"/> | <input type="checkbox"/> | <input type="checkbox"/> | <input type="checkbox"/> | <input type="checkbox"/> | <input type="checkbox"/> |                          |  |
|             |                                                                                    |                                                                                                                                                                                                                                                                                | Week 3 |      |             |                          | <input type="checkbox"/> | <input type="checkbox"/> | <input type="checkbox"/> | <input type="checkbox"/> | <input type="checkbox"/> | <input type="checkbox"/> | <input type="checkbox"/> | <input type="checkbox"/> | <input type="checkbox"/> | <input type="checkbox"/> | <input type="checkbox"/> | <input type="checkbox"/> |  |
|             |                                                                                    |                                                                                                                                                                                                                                                                                | Week 4 |      |             |                          | <input type="checkbox"/> | <input type="checkbox"/> | <input type="checkbox"/> | <input type="checkbox"/> | <input type="checkbox"/> | <input type="checkbox"/> | <input type="checkbox"/> | <input type="checkbox"/> | <input type="checkbox"/> | <input type="checkbox"/> | <input type="checkbox"/> | <input type="checkbox"/> |  |
|             |                                                                                    |                                                                                                                                                                                                                                                                                | Week 5 |      |             |                          | <input type="checkbox"/> | <input type="checkbox"/> | <input type="checkbox"/> | <input type="checkbox"/> | <input type="checkbox"/> | <input type="checkbox"/> | <input type="checkbox"/> | <input type="checkbox"/> | <input type="checkbox"/> | <input type="checkbox"/> | <input type="checkbox"/> | <input type="checkbox"/> |  |
|             |                                                                                    |                                                                                                                                                                                                                                                                                | Week 6 |      |             |                          | <input type="checkbox"/> | <input type="checkbox"/> | <input type="checkbox"/> | <input type="checkbox"/> | <input type="checkbox"/> | <input type="checkbox"/> | <input type="checkbox"/> | <input type="checkbox"/> | <input type="checkbox"/> | <input type="checkbox"/> | <input type="checkbox"/> | <input type="checkbox"/> |  |
|             |  | <ol style="list-style-type: none"> <li>1. Standing with feet shoulder width apart</li> <li>2. Tie red band around ankles</li> <li>3. Maintain a 30 degree hip and knee position</li> <li>4. Take diagonal, forward steps</li> <li>5. Forwards and then backwards</li> </ol>    | Week 1 |      |             | <input type="checkbox"/> | <input type="checkbox"/> | <input type="checkbox"/> | <input type="checkbox"/> | <input type="checkbox"/> | <input type="checkbox"/> | <input type="checkbox"/> | <input type="checkbox"/> | <input type="checkbox"/> | <input type="checkbox"/> | <input type="checkbox"/> |                          |                          |  |
|             |                                                                                    |                                                                                                                                                                                                                                                                                | Week 2 |      |             | <input type="checkbox"/> | <input type="checkbox"/> | <input type="checkbox"/> | <input type="checkbox"/> | <input type="checkbox"/> | <input type="checkbox"/> | <input type="checkbox"/> | <input type="checkbox"/> | <input type="checkbox"/> | <input type="checkbox"/> | <input type="checkbox"/> | <input type="checkbox"/> | <input type="checkbox"/> |  |
|             |                                                                                    |                                                                                                                                                                                                                                                                                | Week 3 |      |             |                          | <input type="checkbox"/> | <input type="checkbox"/> | <input type="checkbox"/> | <input type="checkbox"/> | <input type="checkbox"/> | <input type="checkbox"/> | <input type="checkbox"/> | <input type="checkbox"/> | <input type="checkbox"/> | <input type="checkbox"/> | <input type="checkbox"/> | <input type="checkbox"/> |  |
|             |                                                                                    |                                                                                                                                                                                                                                                                                | Week 4 |      |             |                          | <input type="checkbox"/> | <input type="checkbox"/> | <input type="checkbox"/> | <input type="checkbox"/> | <input type="checkbox"/> | <input type="checkbox"/> | <input type="checkbox"/> | <input type="checkbox"/> | <input type="checkbox"/> | <input type="checkbox"/> | <input type="checkbox"/> | <input type="checkbox"/> |  |
|             |                                                                                    |                                                                                                                                                                                                                                                                                | Week 5 |      |             |                          | <input type="checkbox"/> | <input type="checkbox"/> | <input type="checkbox"/> | <input type="checkbox"/> | <input type="checkbox"/> | <input type="checkbox"/> | <input type="checkbox"/> | <input type="checkbox"/> | <input type="checkbox"/> | <input type="checkbox"/> | <input type="checkbox"/> | <input type="checkbox"/> |  |

Patient Number

|  |  |  |
|--|--|--|
|  |  |  |
|--|--|--|

Date of issue

|   |   |   |   |   |   |
|---|---|---|---|---|---|
| D | D | M | M | Y | Y |
|---|---|---|---|---|---|

## WEEK SIX – Home Exercise Training Diary

Please perform the marked exercises three times per week (including the supervised session). Mark when the exercises are completed – there are seven boxes, one for each day of the week.

Rest for 2 minutes between sets

|  |                                                                                   |                                                                                                                                                                                                                                                                               |        |  |  |  |  |  |  |  |  |  |  |  |  |  |  |  |  |
|--|-----------------------------------------------------------------------------------|-------------------------------------------------------------------------------------------------------------------------------------------------------------------------------------------------------------------------------------------------------------------------------|--------|--|--|--|--|--|--|--|--|--|--|--|--|--|--|--|--|
|  |                                                                                   |                                                                                                                                                                                                                                                                               | Week 6 |  |  |  |  |  |  |  |  |  |  |  |  |  |  |  |  |
|  |                                                                                   |                                                                                                                                                                                                                                                                               |        |  |  |  |  |  |  |  |  |  |  |  |  |  |  |  |  |
|  |  | <ol style="list-style-type: none"> <li>1. Standing with feet shoulder width apart</li> <li>2. Tie green band around ankles</li> <li>3. Maintain a 30 degree hip and knee position</li> <li>4. Take diagonal, forward steps</li> <li>5. Forwards and then backwards</li> </ol> | Week 1 |  |  |  |  |  |  |  |  |  |  |  |  |  |  |  |  |
|  |                                                                                   |                                                                                                                                                                                                                                                                               | Week 2 |  |  |  |  |  |  |  |  |  |  |  |  |  |  |  |  |
|  |                                                                                   |                                                                                                                                                                                                                                                                               | Week 3 |  |  |  |  |  |  |  |  |  |  |  |  |  |  |  |  |
|  |                                                                                   |                                                                                                                                                                                                                                                                               | Week 4 |  |  |  |  |  |  |  |  |  |  |  |  |  |  |  |  |
|  |                                                                                   |                                                                                                                                                                                                                                                                               | Week 5 |  |  |  |  |  |  |  |  |  |  |  |  |  |  |  |  |
|  |                                                                                   |                                                                                                                                                                                                                                                                               | Week 6 |  |  |  |  |  |  |  |  |  |  |  |  |  |  |  |  |

Patient Number

|  |  |  |
|--|--|--|
|  |  |  |
|--|--|--|

Date of issue

|   |   |   |   |   |   |
|---|---|---|---|---|---|
| D | D | M | M | Y | Y |
|---|---|---|---|---|---|
